# Supplementary material for: Targeting mutant RAS in patient-derived colorectal cancer organoids by combinatorial drug screening
Source: eLife journal article supplement (doi:10.7554/elife.18489), 2016-11-15

Figure 4-Source data 1

# Combination therapy: EGFRi & MEKi

P18T

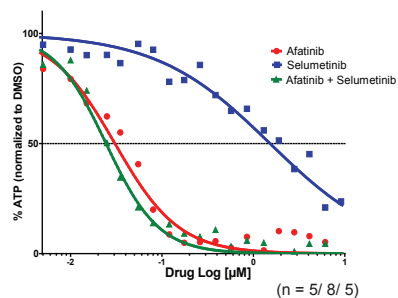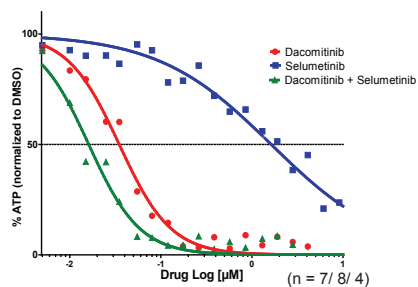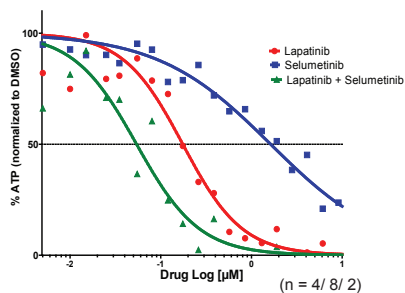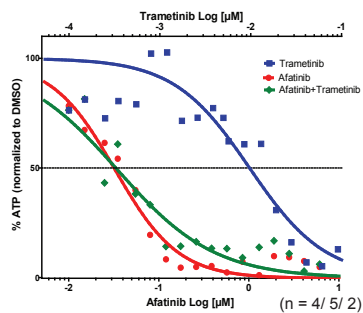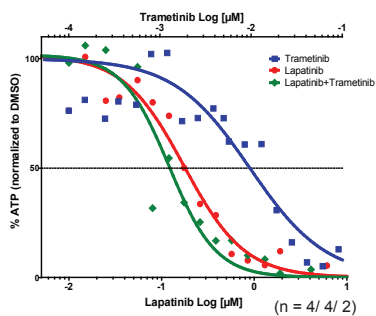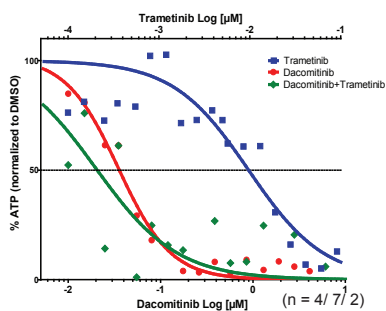

P18T KRAS<sup>G12D</sup>

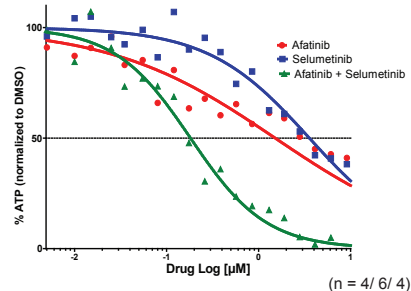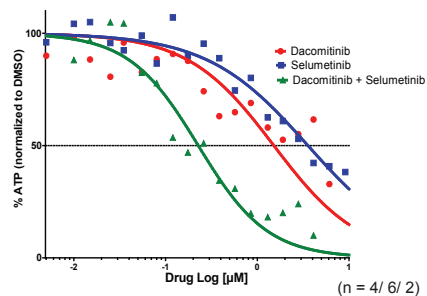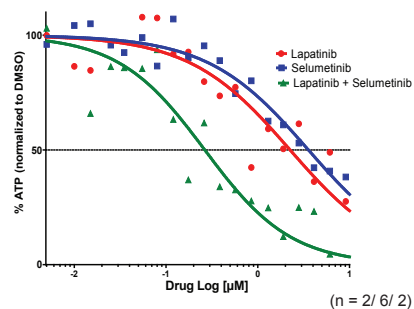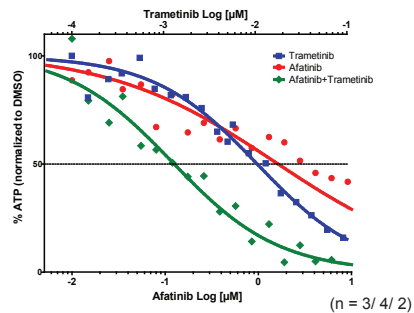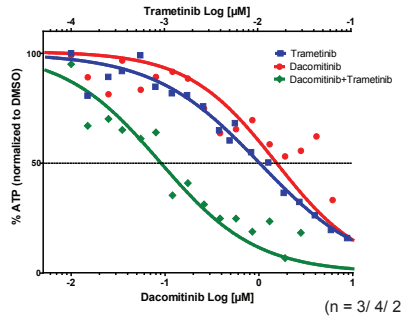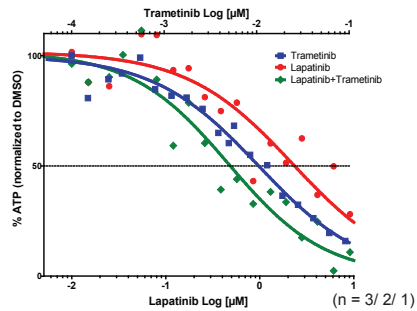

# Combination therapy: MEKi & ERKi

P18T

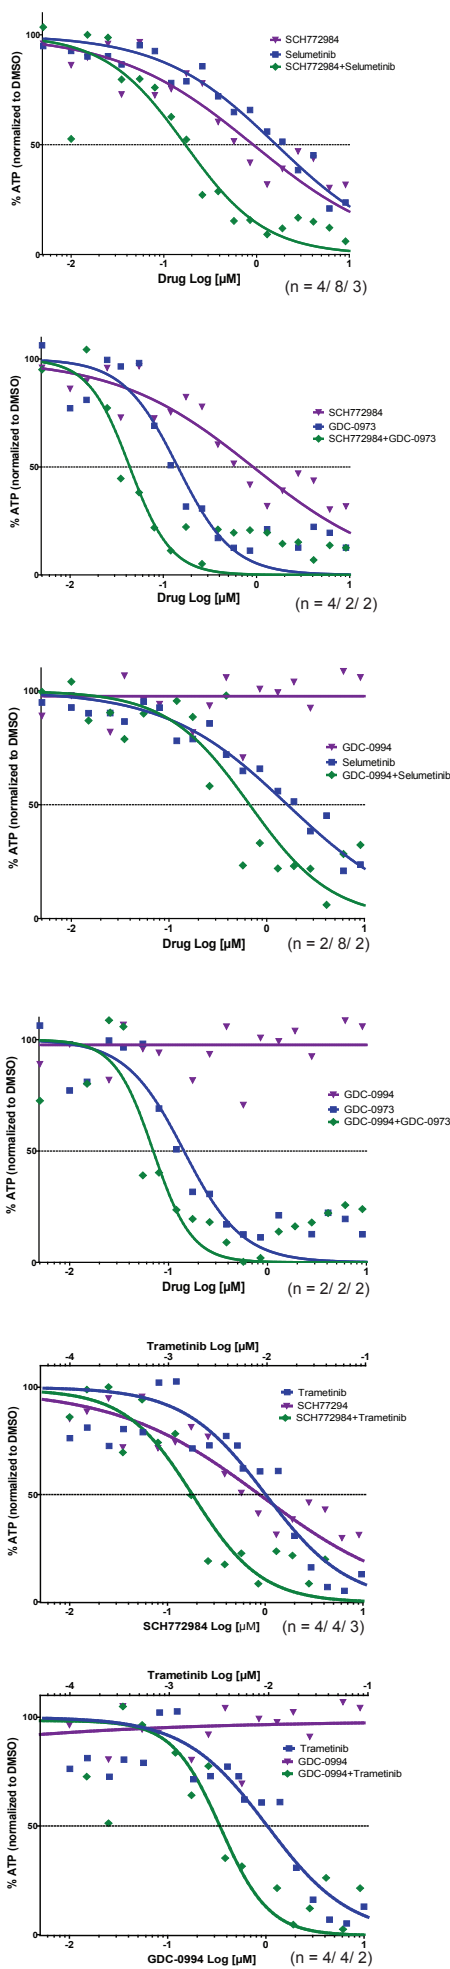

P18T KRAS<sup>G12D</sup>

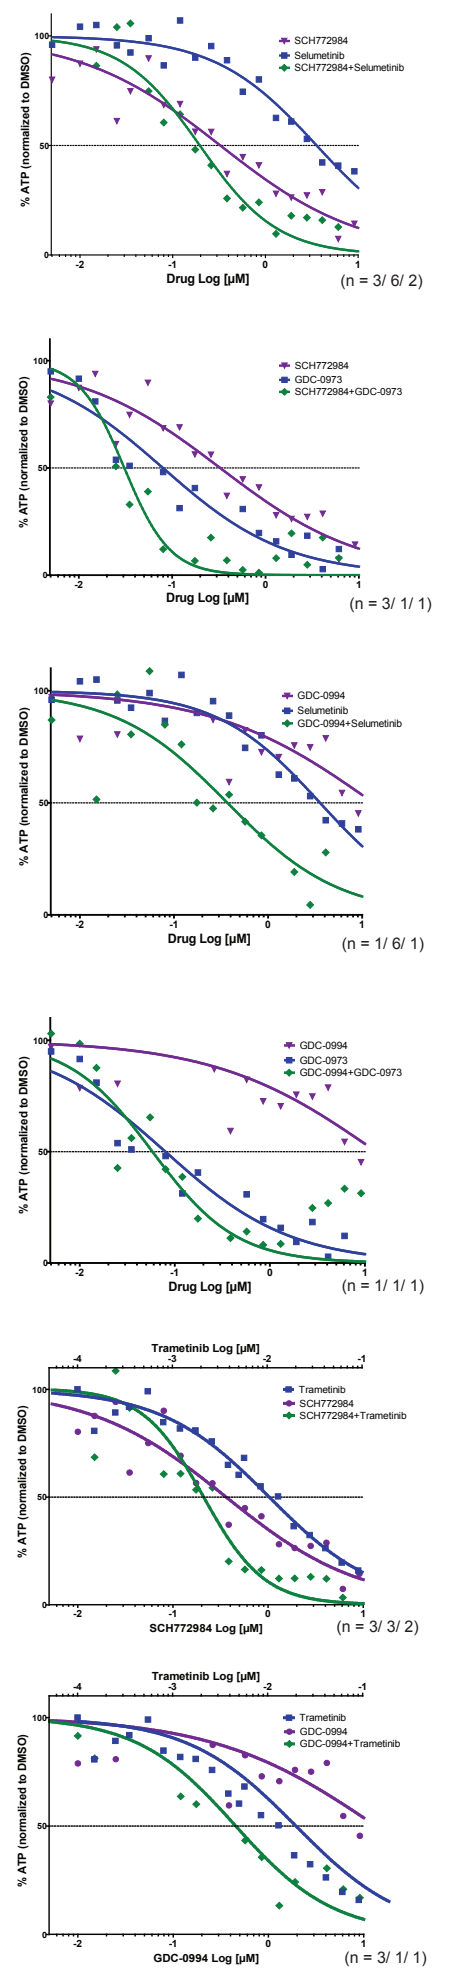

# Combination therapy: EGFRi & ERKi

P18T

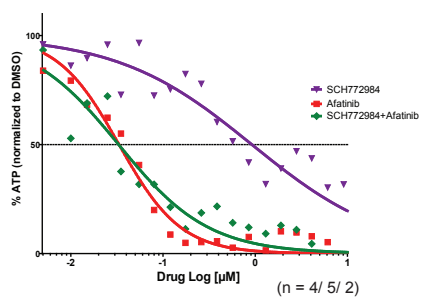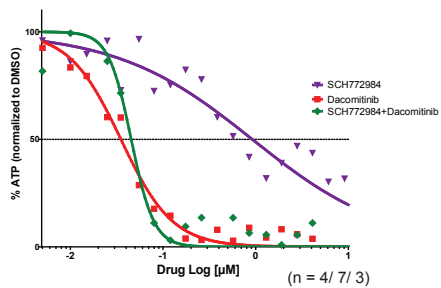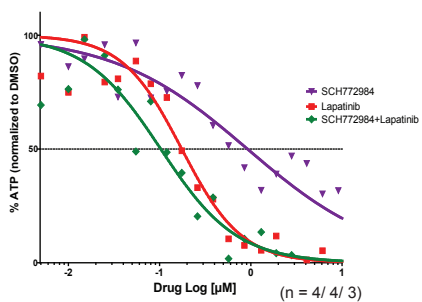

P18T KRAS<sup>G12D</sup>

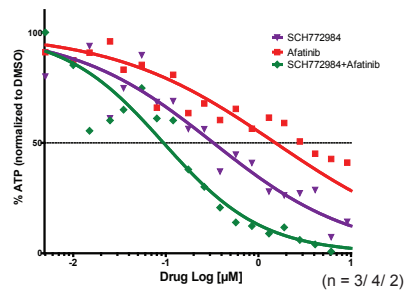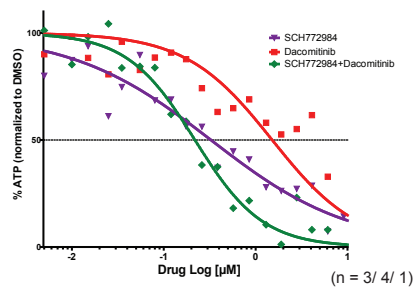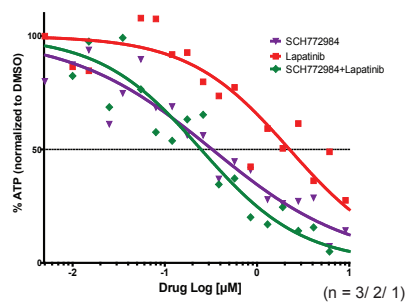

Supplement: supp [file elife_poa_e18489_Figure_4_source_data_1.pdf › elife_poa_e18489_Figure_4_source_data_1.pdf]
