# Supplementary material for: Targeting mutant RAS in patient-derived colorectal cancer organoids by combinatorial drug screening
Source: eLife journal article supplement (doi:10.7554/elife.18489), 2016-11-15

Figure 6-Source data 4

# Combination therapy: EGFRi & MEKi afatinib & selumetinib

KRAS<sup>mutant</sup>

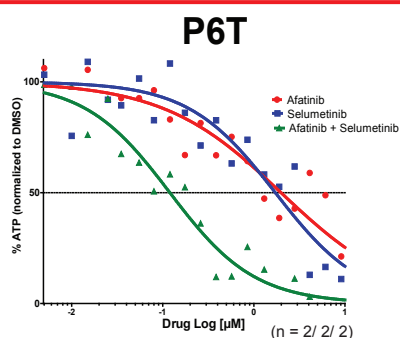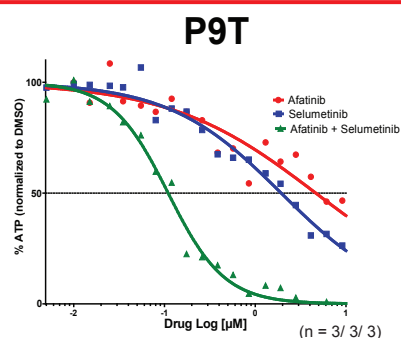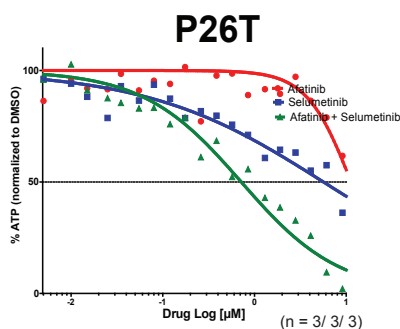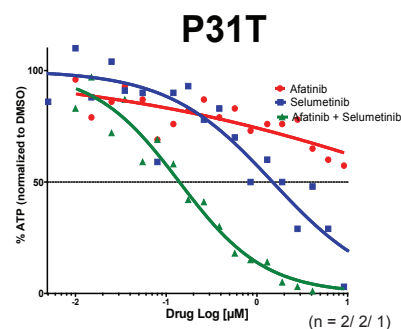

BRAF<sup>mutant</sup>

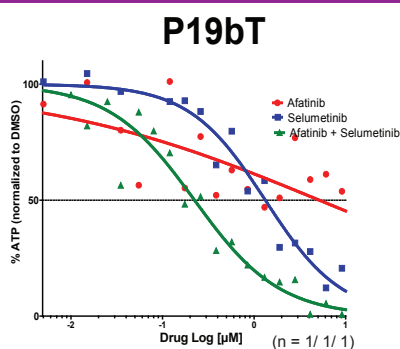

NRAS<sup>mutant</sup>

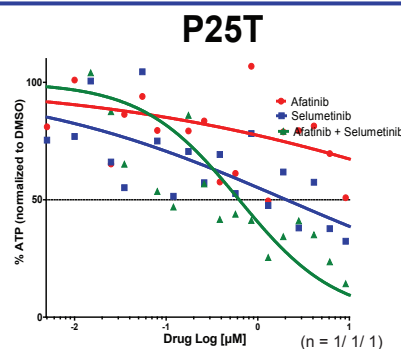

KRAS<sup>WT</sup>

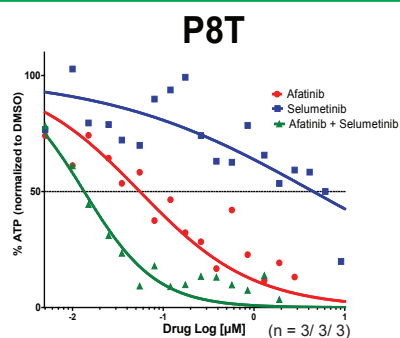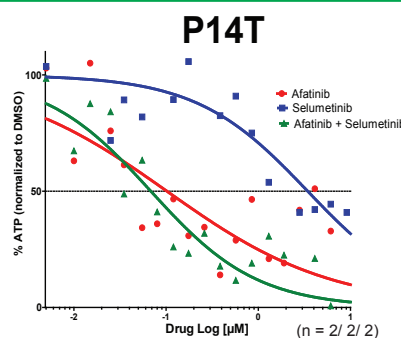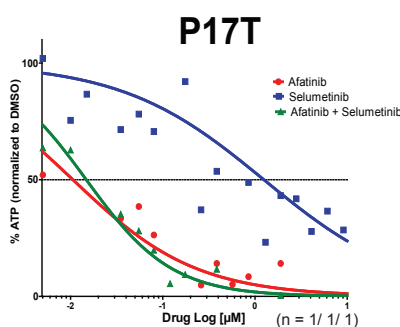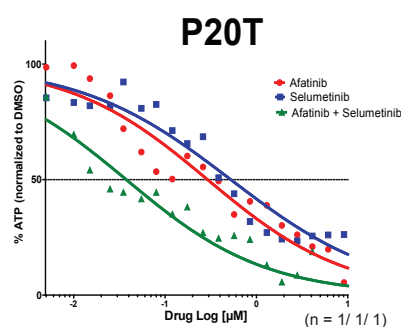

# Combination therapy: EGFRi & MEKi

dacomitinib & selumetinib

KRAS<sup>mutant</sup>

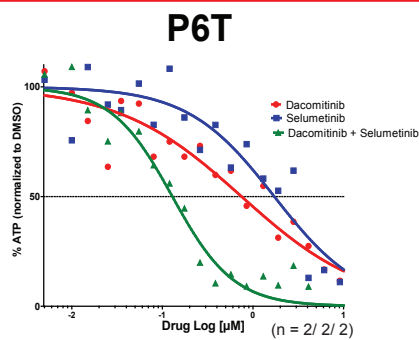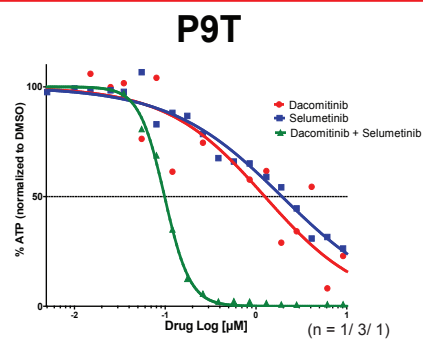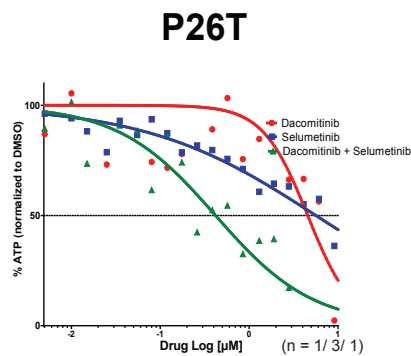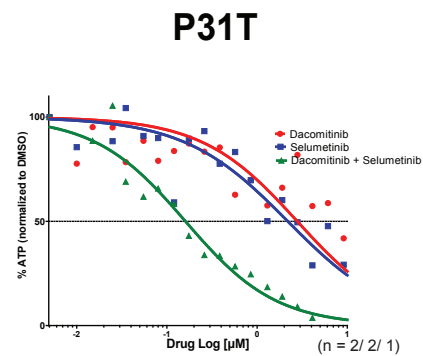

BRAF<sup>mutant</sup>

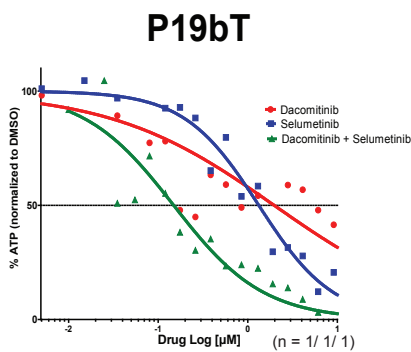

NRAS<sup>mutant</sup>

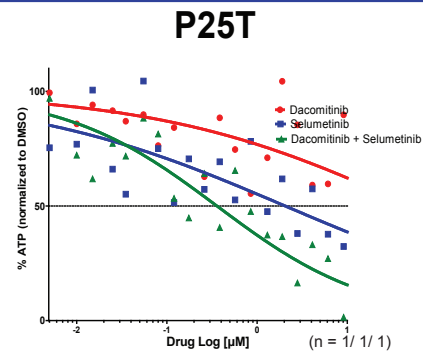

KRAS<sup>WT</sup>

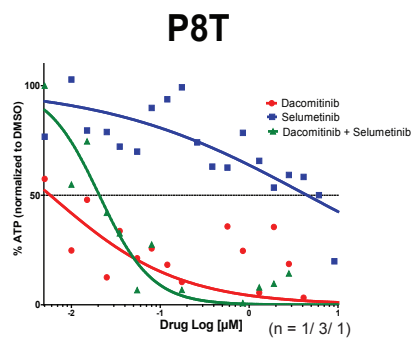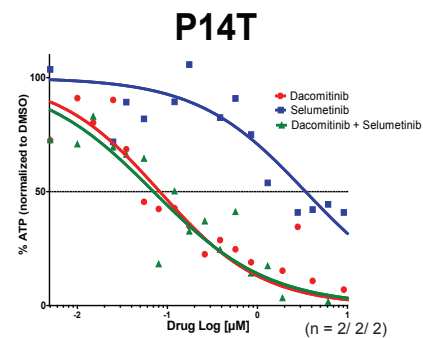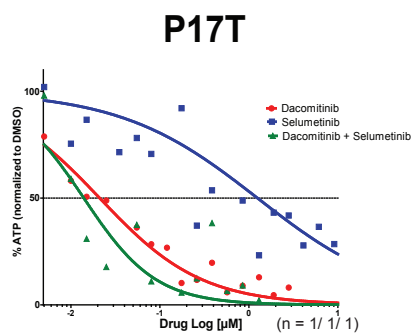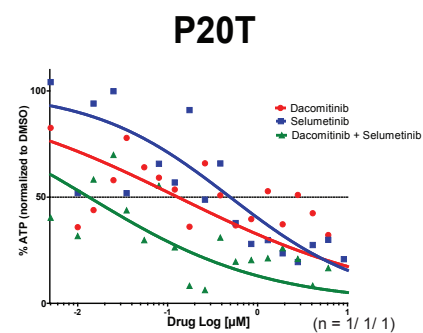

# Combination therapy: EGFRi & MEKi

lapatinib & selumetinib

KRAS<sup>mutant</sup>

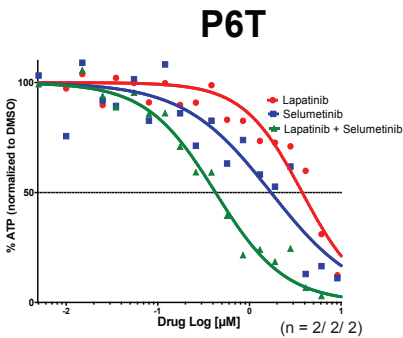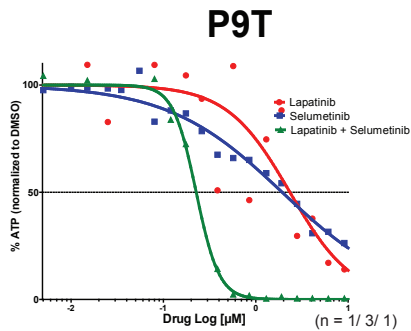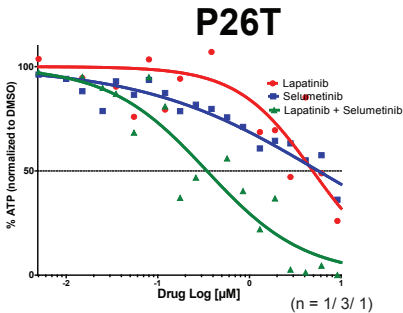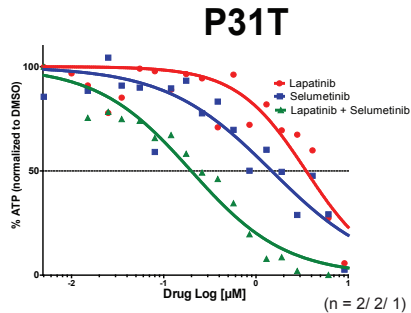

BRAF<sup>mutant</sup>

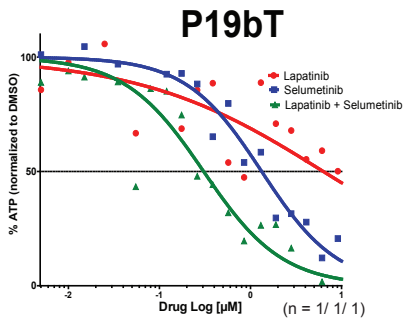

NRAS<sup>mutant</sup>

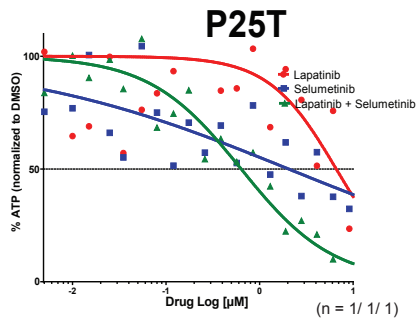

KRAS<sup>WT</sup>

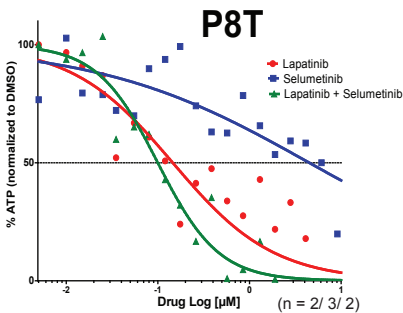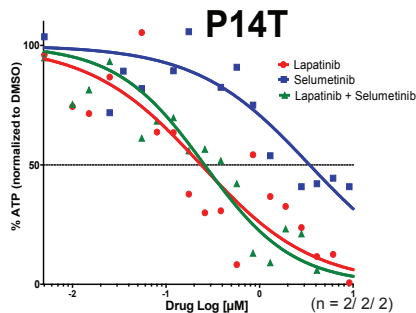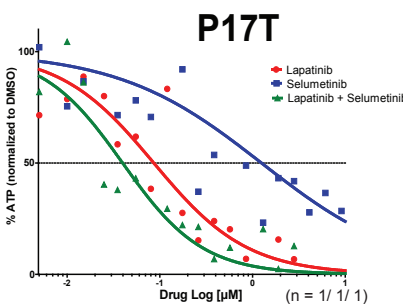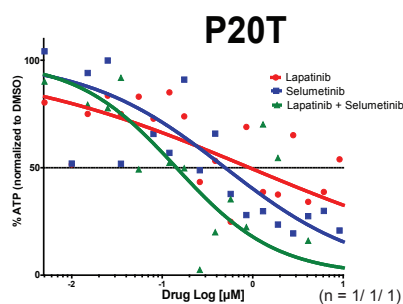

# Combination therapy: MEKi & ERKi

## selumetinib & SCH772984

KRAS<sup>mutant</sup>

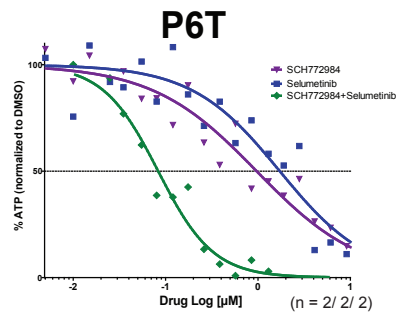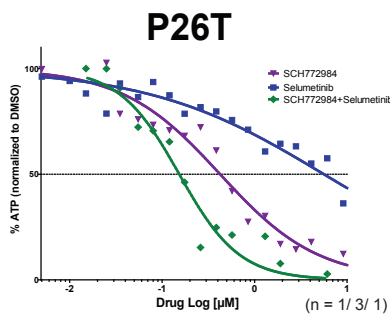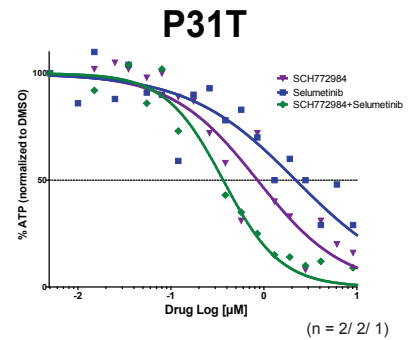

BRAF<sup>mutant</sup>

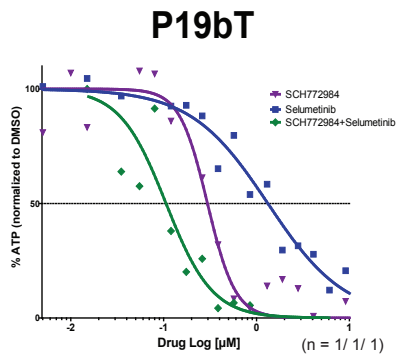

NRAS<sup>mutant</sup>

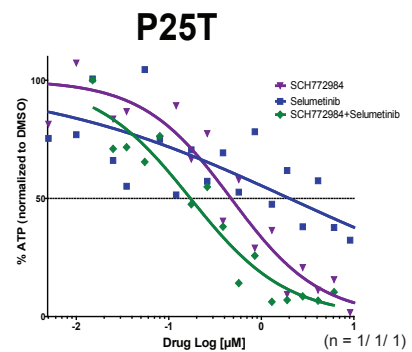

KRAS<sup>WT</sup>

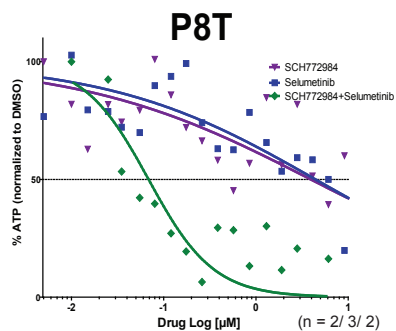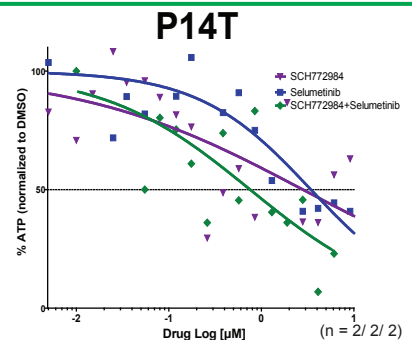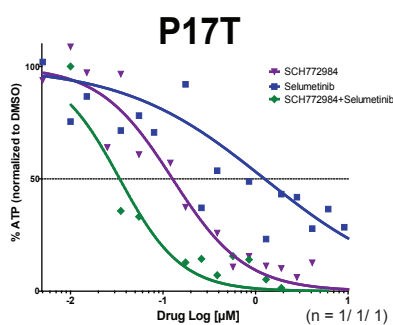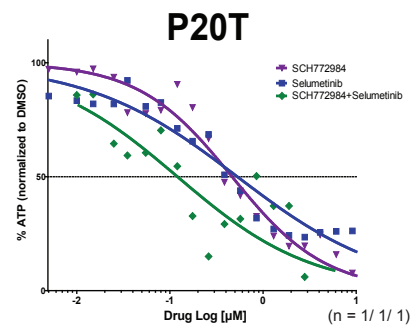

# Combination therapy: MEKi & ERKi

## trametinib & SCH772984

KRAS<sup>mutant</sup>

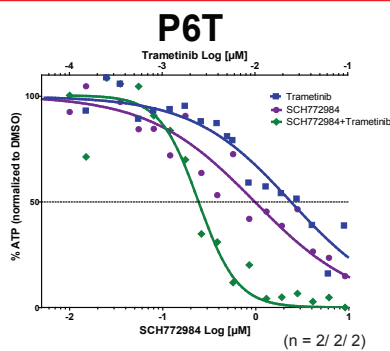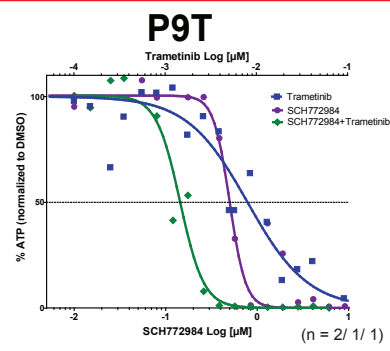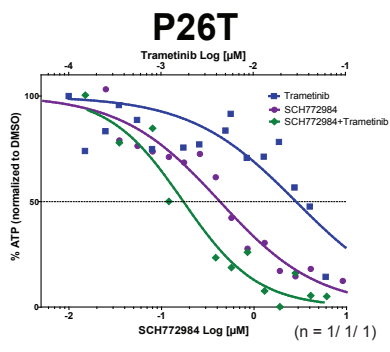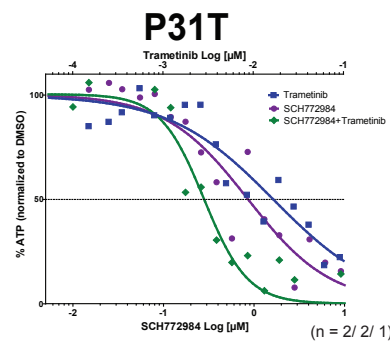

BRAF<sup>mutant</sup>

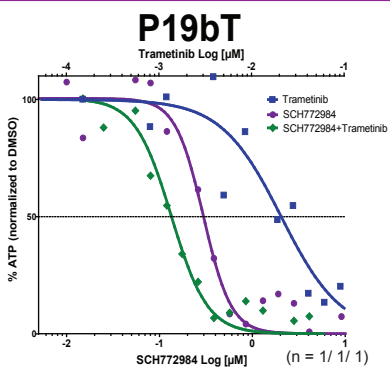

NRAS<sup>mutant</sup>

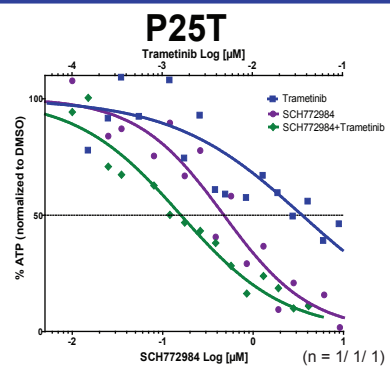

KRAS<sup>WT</sup>

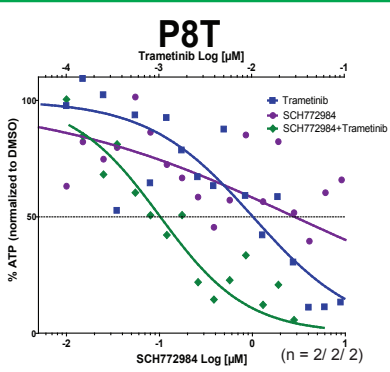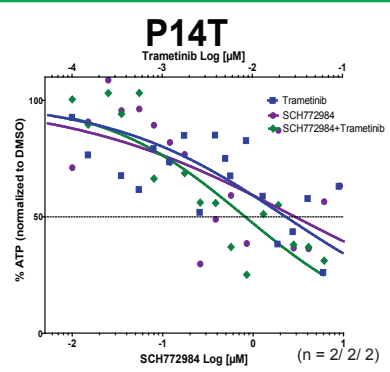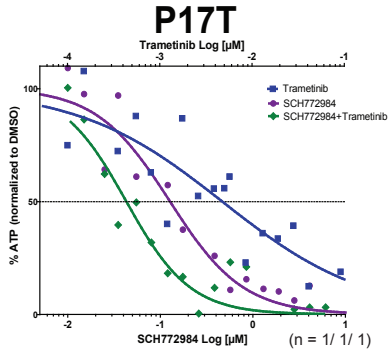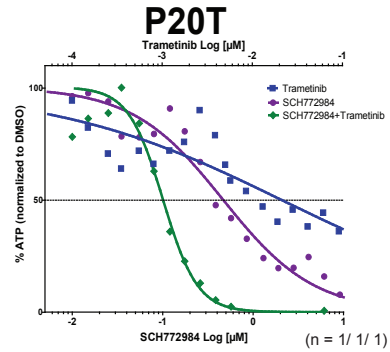

# Combination therapy: EGFRi & ERKi

## afatinib & SCH772984

KRAS<sup>mutant</sup>

P6T

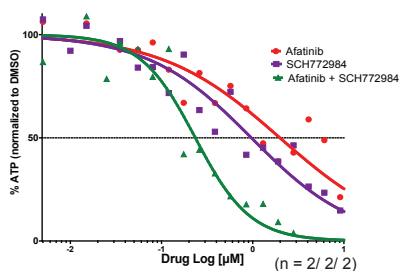

P9T

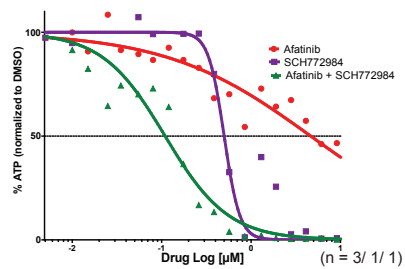

P26T

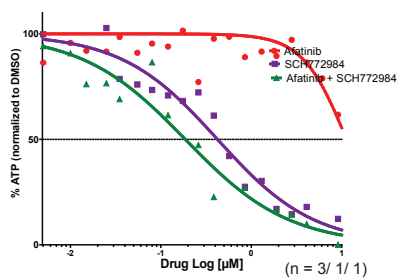

P31T

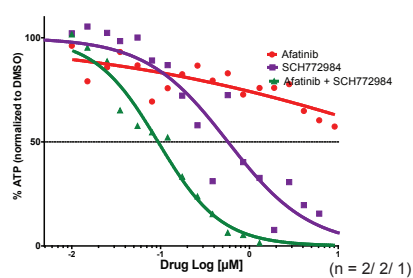

BRAF<sup>mutant</sup>

P19bT

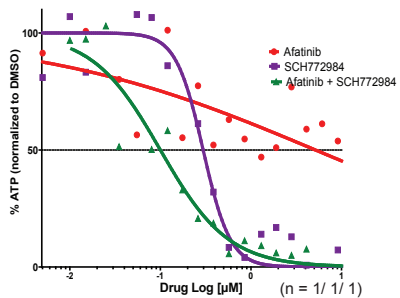

NRAS<sup>mutant</sup>

P25T

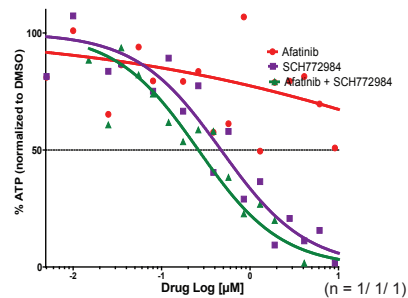

KRAS<sup>WT</sup>

P8T

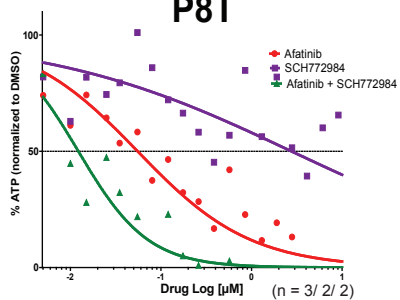

P14T

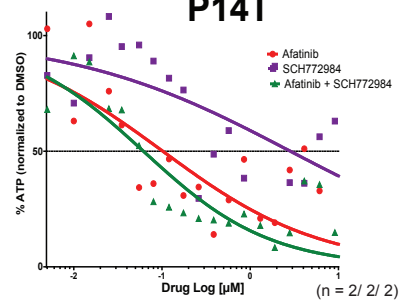

P17T

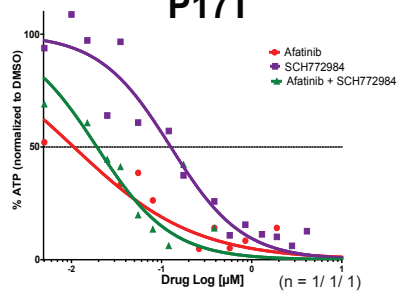

P20T

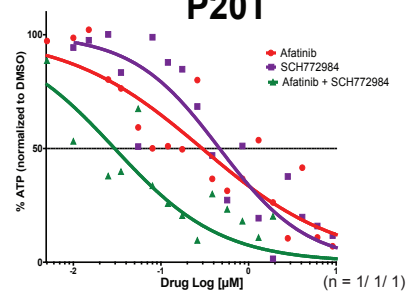

# Combination therapy: EGFRi & ERKi

dacomitinib & SCH772984

KRAS<sup>mutant</sup>

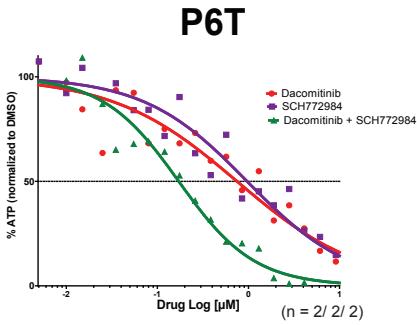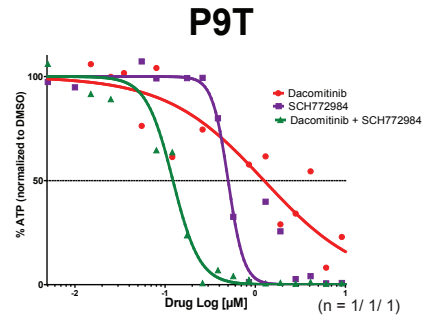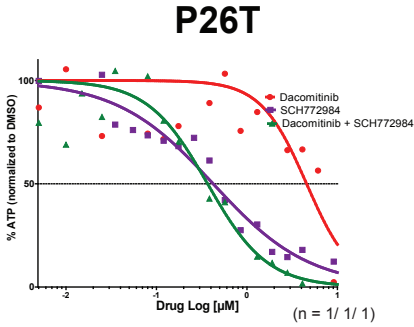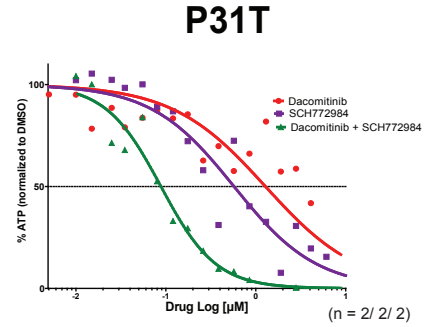

BRAF<sup>mutant</sup>

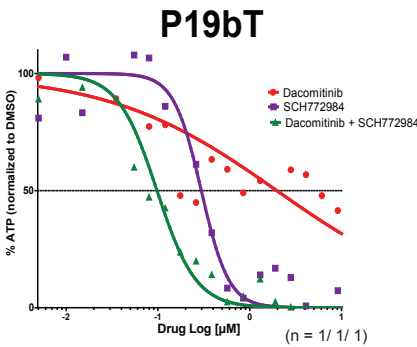

NRAS<sup>mutant</sup>

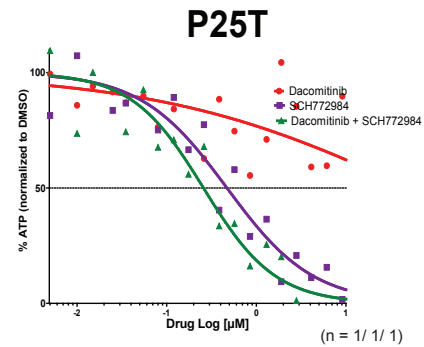

KRAS<sup>WT</sup>

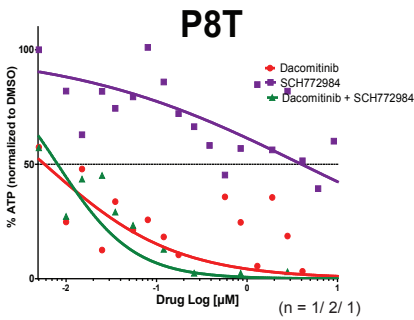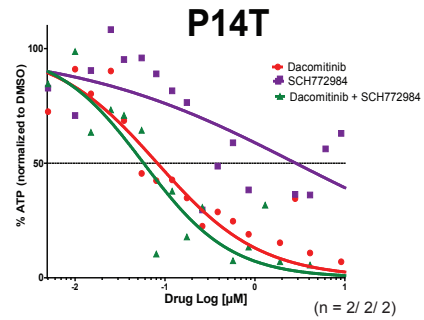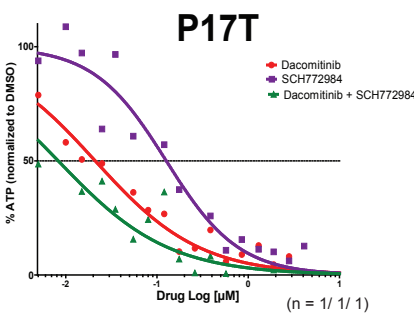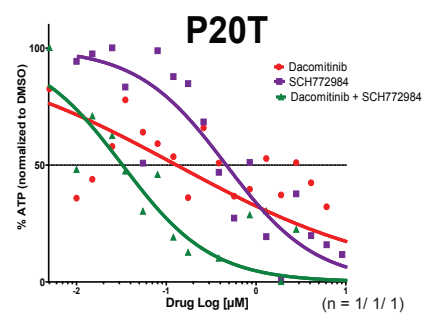

# Combination therapy: EGFRi & ERKi

lapatinib & SCH772984

## KRAS<sup>mutant</sup>

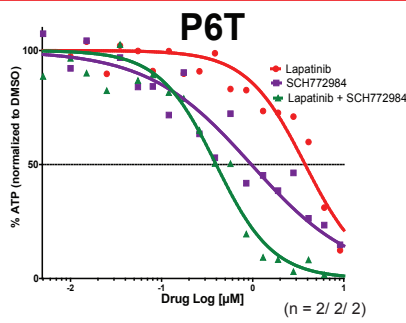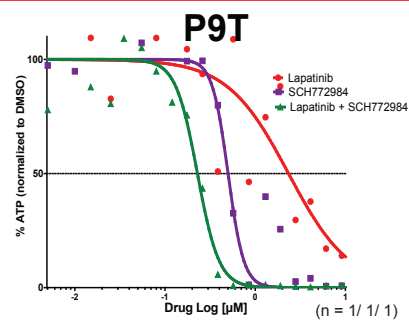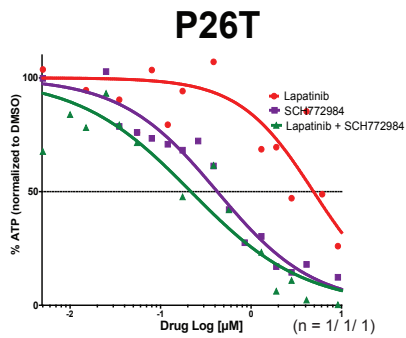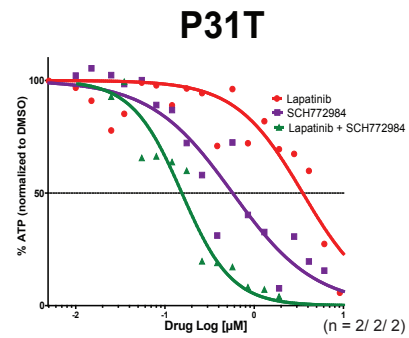

## BRAF<sup>mutant</sup>

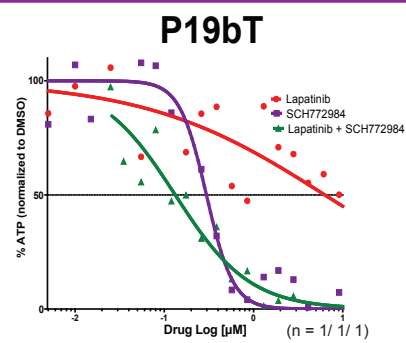

## NRAS<sup>mutant</sup>

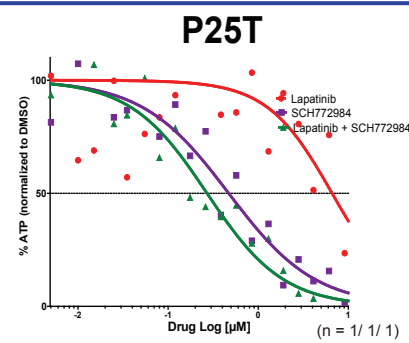

## KRAS<sup>WT</sup>

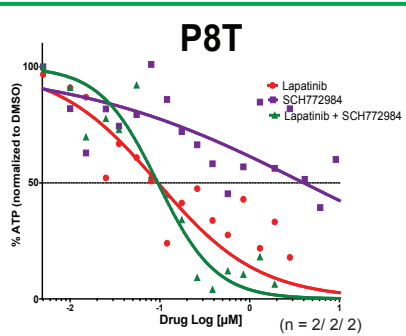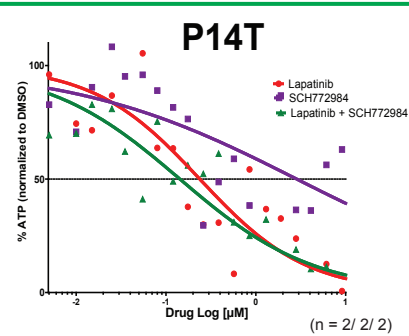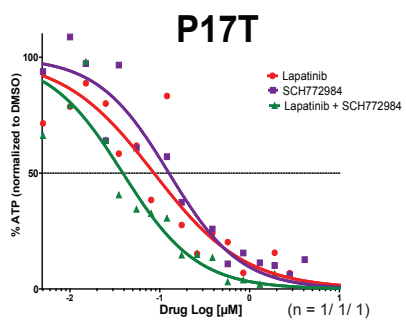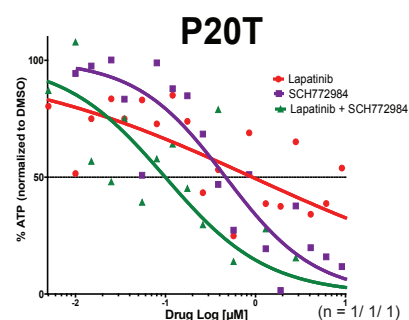



# Combination therapy: EGFRi & MEKi

afatinib & trametinib

KRAS<sup>mutant</sup>

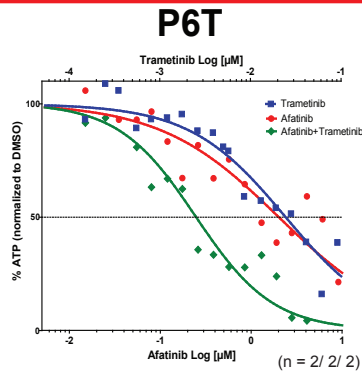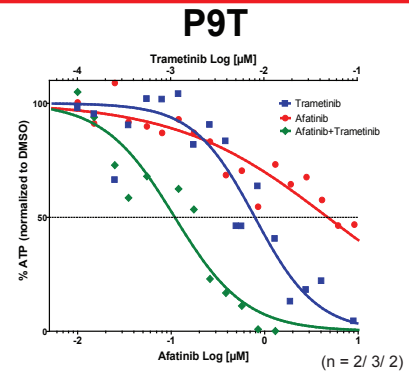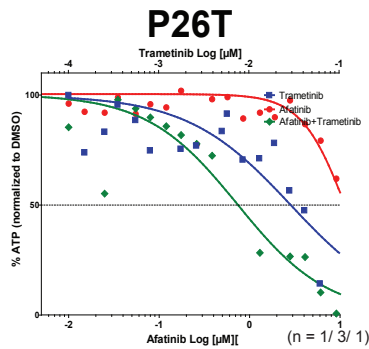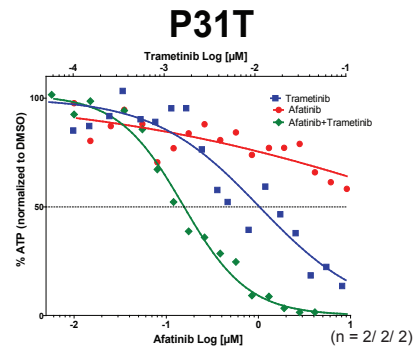

BRAF<sup>mutant</sup>

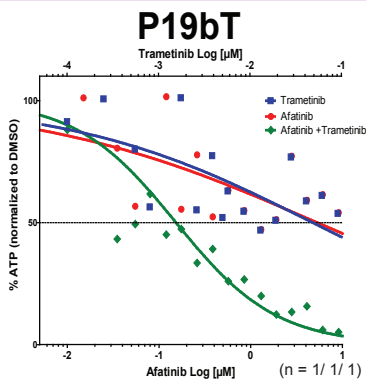

NRAS<sup>mutant</sup>

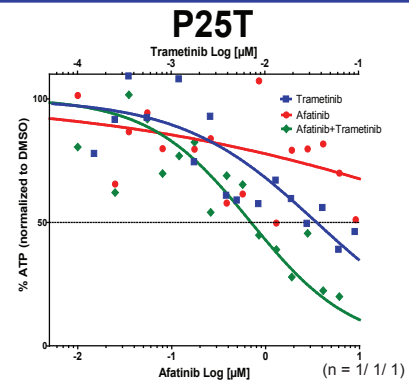

KRAS<sup>WT</sup>

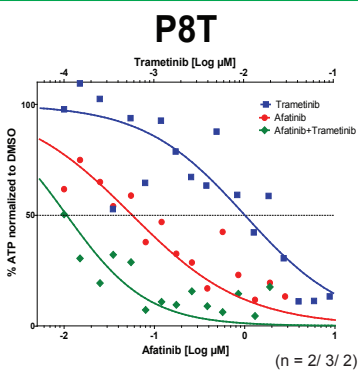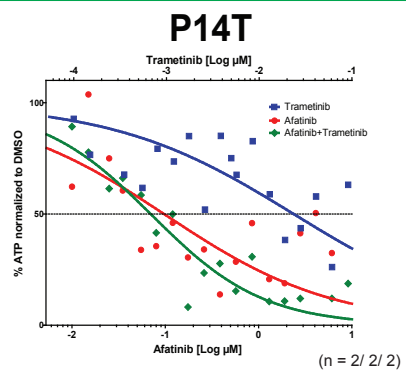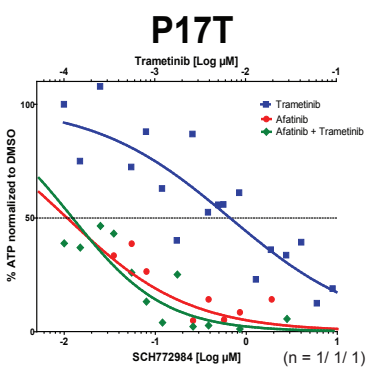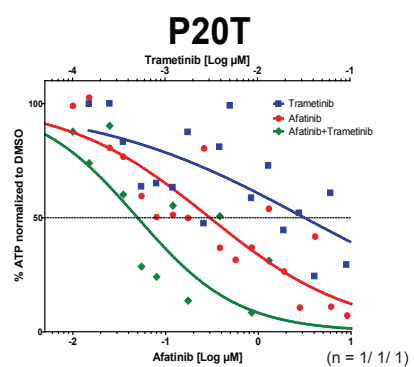

# Combination therapy: EGFRi & MEKi

dacomitinib & trametinib

KRAS<sup>mutant</sup>

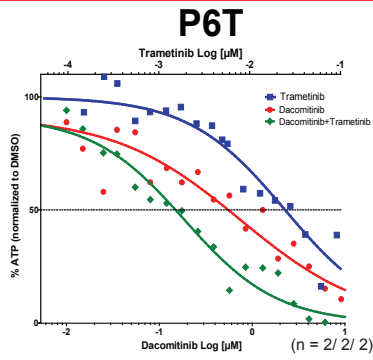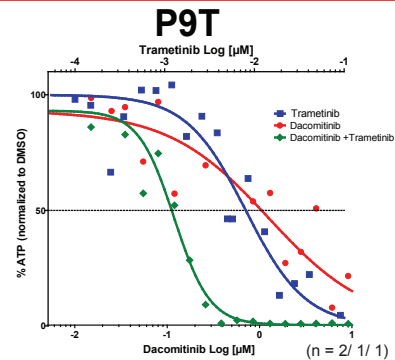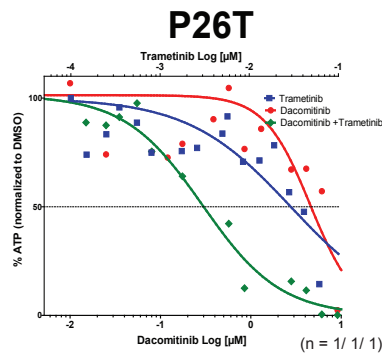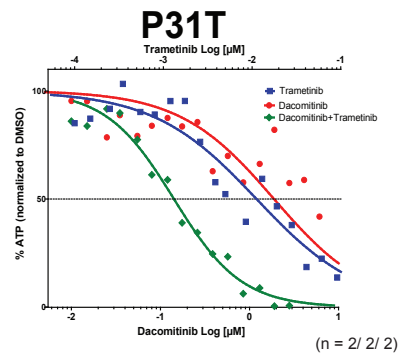

BRAF<sup>mutant</sup>

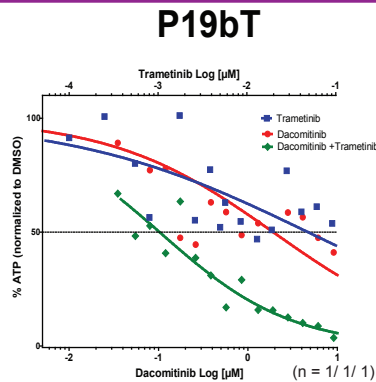

NRAS<sup>mutant</sup>

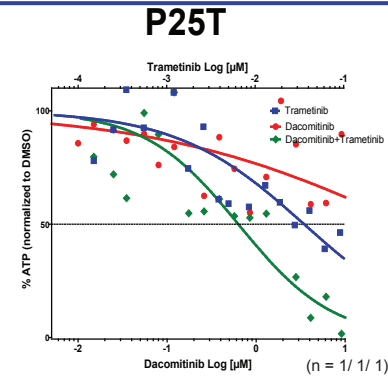

KRAS<sup>WT</sup>

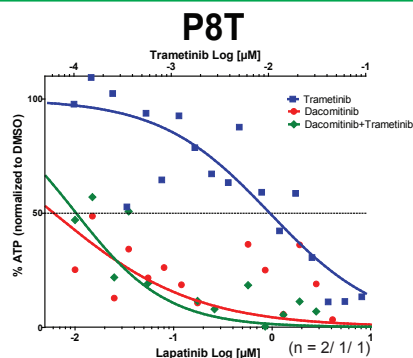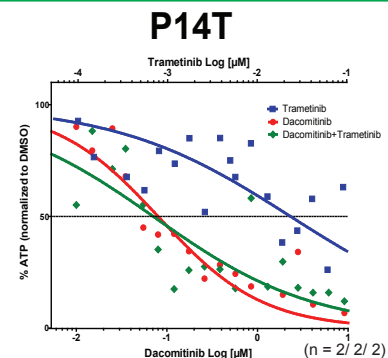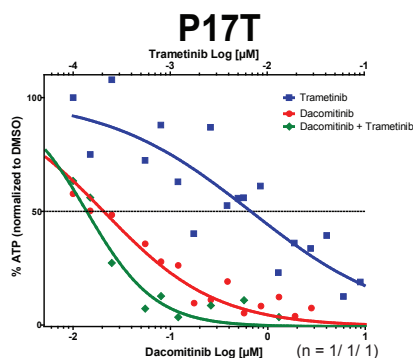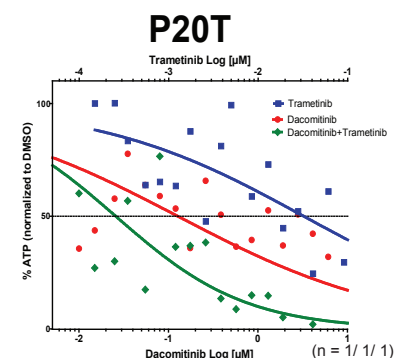

# Combination therapy: EGFRi & MEKi

lapatinib & trametinib

KRAS<sup>mutant</sup>

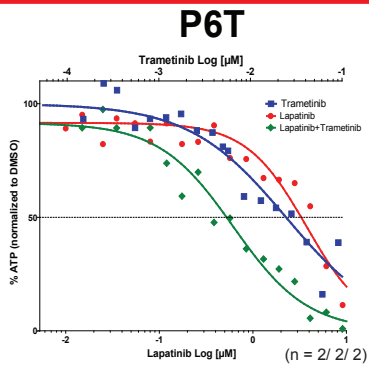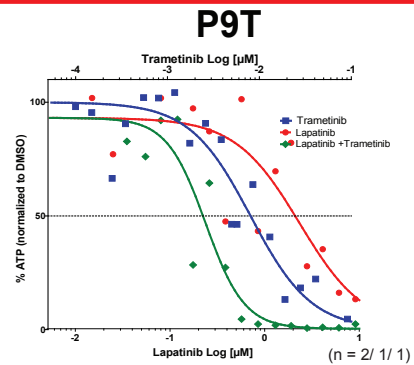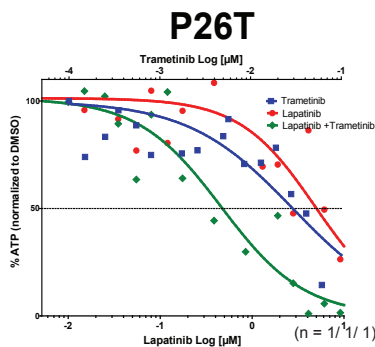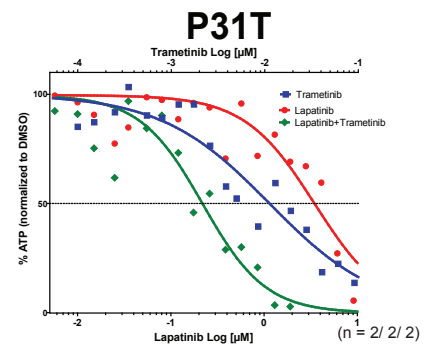

BRAF<sup>mutant</sup>

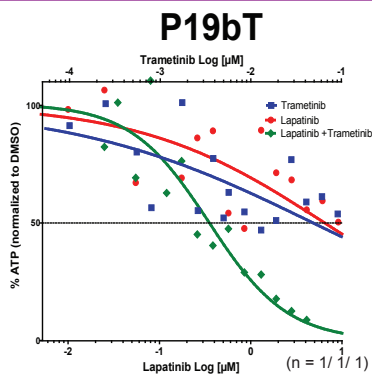

NRAS<sup>mutant</sup>

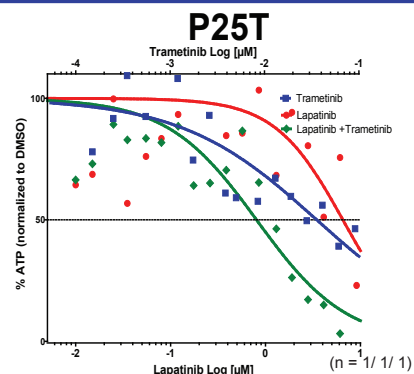

KRAS<sup>WT</sup>

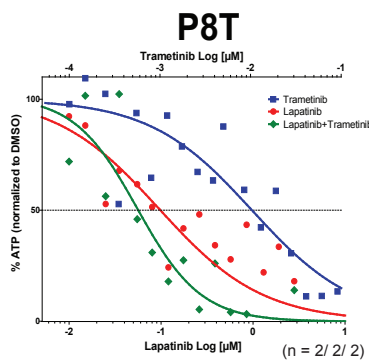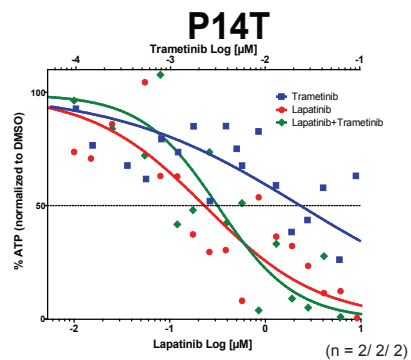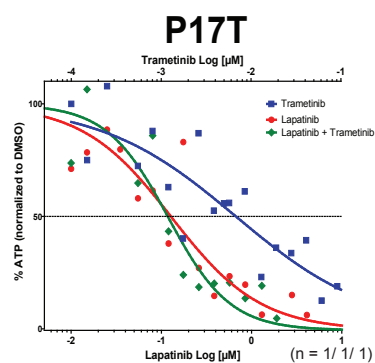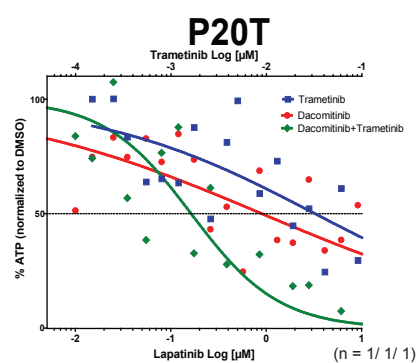

Supplement: supp [file elife_poa_e18489_Figure_6_source_data_1.pdf › elife_poa_e18489_Figure_6_source_data_1.pdf]
