# Supplementary material for: Targeting mutant RAS in patient-derived colorectal cancer organoids by combinatorial drug screening
Source: eLife. 2016 Nov 15;5:e18489. doi: 10.7554/eLife.18489 (PMC5127645; doi:10.7554/eLife.18489)
Supplement: Supplementary file 1. — DOI: http://dx.doi.org/10.7554/eLife.18489.039 [file elife-18489-supp1.xlsx]

## Sheet: normal
drug concentration (µM)	20	13.5	9.1	6.1	4.1	2.8	1.9	1.3	0.85	0.57	0.385	0.26	0.175	0.12	0.08	0.055	0.035	0.025	0.015	0.01	0.005	0
Afa		-9.08025	-5.47812	-5.91691	-2.09793	2.00583	-2.58182	-0.0584468	4.64272	-3.07448	0.0256954	5.43815	4.16404	10.6508	23.1489	36.0186	43.9239	43.8379	56.8819	69.3995	80.5338	100
Daco		-10.5135	-10.194	-10.0592	-2.53981	-4.41401	-1.83943	4.02263	-0.808891	-3.4272	-2.12923	-5.48868	-1.01851	3.18072	0.38171	7.65108	13.4347	-9.55645	16.7495	-7.0026	40.9642	100
Lap		-25.6946	-24.1445	-14.2697	-2.1782	6.80425	29.9219	2.75301	43.5724	35.3802	61.0011	60.7652	89.3659	82.5397	55.8137	94.5311	103.416	54.8383	89.2083	119.823	86.4667	100
Sel		5.49118	9.3119	21.7462	39.0682	41.2719	61.6377	56.7526	69.0698	87.5103	94.1567	66.5889	62.1327	100.507	93.423	99.7032	78.8538	76.6637	73.6581	89.3924	82.2742	100
Tram		-6.07236	4.53209	7.43769	21.4478	33.1421	27.2072	52.7516	91.9527	74.0871	76.8426	80.2862	66.7593	101.779	100.92	101.423	75.1625	81.5379	109.392	101.257	83.2972	100
GDC0973		11.9636	1.00572	-18.2553	-38.7065	-38.3109	5.67398	-9.31076	-6.21047	18.9304	-27.6452	18.6988	78.4952	72.7222	88.2771	97.2751	46.1203	88.5087	110.923	100	58.2007	100
SCH		-17.6176	-2.16949	21.0118	19.3483	9.52606	33.377	38.5042	34.6211	34.7525	45.0109	64.5832	83.7878	54.1669	73.3087	92.5852	128.527	56.9536	79.51	101.049	116.064	100
GDC0994		68.0361	72.3302	91.9119		69.8535	60.8912	51.4656	88.6869	52.1427	81.6489	77.7646	128.046		73.9516	88.6691	155.789	138.773	128.064		117.65	100
Afa+Sel		-23.5212	-17.2184	-14.1398	-18.9042	-9.3136	-7.94474	-6.94503	-22.6031	-13.4313	-18.8789	-13.7844	1.66436	14.1247	10.2562	21.4778	47.6102	73.1625	54.8752	66.0978	88.286	100
Afa+Tram		-10.7172	-9.49792	-7.52383	-7.03031	-3.38697	1.92564	-10.4458	-5.70942	-1.41289	2.59334	-2.69023	0.270892	-1.32579	-0.0629584	15.1201	33.6126	40.4928	49.8842	58.3612	74.7345	100
Afa+Sch		-25.6445	-37.7479	-19.4387	-21.9969	-13.7042	-15.0792	-16.5254	-11.1911	-23.3307	-2.2767	-2.49765	-15.3992	2.35338	25.5408	39.7785	37.8277	25.9049	54.5051	103.306	86.6985	100
Daco+Sel		-11.0801	-10.7462	-10.1076	-8.29314	-5.53523	-6.20294	-3.66276	-4.70786	-3.35794	-4.1708	1.67888	1.69339	1.63533	-5.27396	0.343467	10.7945	29.795	30.6369	62.4545	57.9983	100
Daco+Tram		-10.8914	-11.0365	-10.6882	-10.9669	-3.05312	-6.8271	-3.05312	-3.95307	-1.93544	-1.93544	-1.76125	-2.87893	-5.05623	4.24809	15.9474	10.9397	23.9889	45.0506	68.4493	58.2886	100
Daco+Sch		-11.022		-10.6882	-8.87376	-8.83021	-7.43674	-3.43052	-7.90123	-3.00957	-7.61092	-6.04327	-9.91596	0.546682	-1.9935	0.619257	7.25276	48.3021	30.8547	62.8029	49.4197	100
Lap+Sel		-10.8188	-10.485	-9.62855	-8.98988	-6.66743	-1.65964	-4.67883	-0.150052	4.55291	2.81107	19.9246	9.32845	-7.81559	35.5867	38.3591	52.8163	64.1528	88.4224	57.229	87.3773	100
Lap+Tram		-24.934	-25.0598	-24.2164	-17.7565	-12.1615	-10.9416	-20.5239	-19.5988	19.6148	25.4914	54.5746	29.4932	12.5508	50.8251	63.165	37.7092	72.3896	81.751		103.806	100
Lap+Sch			-10.8043	-10.3108	-9.97692	-7.53835	-4.69334	1.18536	1.02569	-4.12725	1.47567		21.1875	34.0771	46.9086	43.8168	66.0833	62.7884	106.349	72.1943	99.8242	100
Sel-SCH		-35.5207	-24.7766	-12.8502	-12.0957	-22.2683	5.97795	-2.25036	1.314	0.999807	19.3354	33.1832	52.4448	86.1746	65.1983	92.1137	91.9641	69.6972	75.4432	85.9335	115.93	100
Sel+GDC-0994		-11.5736	-18.4869	-11.1994	7.43793	2.43115		8.31101	19.7144	21.3002	33.1311		102.781	48.0446	88.4375		118.87	133.855	75.3058	36.962	69.4972	100
Tram+SCH		-40.98	-17.0437	-10.0769	-14.6026	-6.88754	3.94565	-7.36862	-38.4339	25.131	16.8101	52.8732	90.8072	95.0479	108.625	78.7446	67.8936	134.104	70.1743	125.534	85.5064	100
Tram+GDC-0994		11.1262	-12.6427	-0.473152	-13.6761	-3.28836	-11.0391	8.84553	20.1598	72.8826	39.4921	73.1142	51.5725	144.759	122.986	120.919	139.129	123.325	47.1181	92.0545	89.2749	100
GDC-0973+SCH		10.271	0.453375	-10.1126	-3.27054	-2.25493	-9.0435	-12.8387	-19.3422	-18.2731	-16.7764		-8.18824	13.6385	24.4361	42.1826	65.1675	85.1055		82.0765	94.5846	100
GDC-0973+GDC-0994		18.7522	9.57607	-4.92759	-7.99224	-3.128	-14.7986	-9.84529	-1.75603	-11.4489	-7.92097	-16.4735	34.5744			79.9918	125.178		145.294		118.353	100
	%ATP (normalized to DMSO)

## Sheet: normal+KRAS
drug concentration (µM)	20	13.5	9.1	6.1	4.1	2.8	1.9	1.3	0.85	0.57	0.385	0.26	0.175	0.12	0.08	0.055	0.035	0.025	0.015	0.01	0.005	0
Afa	56.6249	71.3549	72.1984	61.7888	61.3624	97.4688	77.4234	109.153	94.3665	76.7756	84.8955	110.593	104.413	77.6063	96.1877	84.1905	96.1016	93.6899	91.1406	132.148	97.1841	100
Daco	33.389	60.8054	52.572	59.3935	81.4101	67.3538	70.3711	60.5073	76.4872	64.9541	83.9551	77.9783	83.3801	81.9375	85.896	98.2309	101.806	88.625	81.5023	75.8569	99.3799	100
Lap	-4.65413	9.88366	15.1333	88.0688	66.0122	109.293	114.536	106.368	78.7226	89.8201	126.66	95.6158	100.048	111.351	98.5948	104.147	108.423	107.613	100.794	114.426	103.38	100
Sel	8.41734	32.1034	25.6827	23.9323	74.017	72.4634	72.5086	90.3642	82.2457	84.5828	76.9826	103.976	100.103	103.082	108.409	104.519	98.151	101.312	109.208	100.579	92.7015	100
Tram	18.3135	24.9589	22.0057	42.3554	43.4137	71.2341	83.7092	78.1522	84.952	85.3653	102.327	107.781	105.76	121.066	127.21	124.776	97.8833	122.889	111.203	99.9238	120.78	100
Sch	7.7967	10.5442	34.6972	24.934	25.5284	43.677	37.7669	47.9931	62.6978	85.6414	92.6628	86.3447	112.366	74.7267	67.2271	84.6745	108.375	98.221	116.474	115.952	108.304	100
Afa+Sel	-10.1931	-7.242	-7.96268	-2.38832	3.20515	15.7145	11.4768	30.5953	19.114	34.6583	60.9757	54.6675	39.4369	93.6967	81.4329	96.5329	88.8631	88.928	110.266	89.4003	103.71	100
Afa+Tram	-6.15411	-7.63106	-7.11859	5.83141	2.70713	20.4161	8.74719	19.7829	36.7172	46.0723	55.4469	38.4359	55.5229	78.2328	93.88	65.6231	69.0719	90.9935	89.0712	86.4045	97.1406	100
Afa+Sch	-10.8452	-7.96832	-1.30151	-5.94587	0.0442181	7.4838	18.6486	43.8954	31.9098	61.7785	49.6646	76.2629	70.2958	82.2895	66.895	83.6671	89.1364	90.5591	125.801	109.658	115.368	100
Daco+Sel	-10.5329	-10.6333	-9.77614	-5.80745	0.147037	5.20027	9.05273	17.2852	12.4449	22.5202	34.4933	40.4237	48.4903	54.1657	56.0142	73.0811	98.0746	69.6601	95.9599	75.5357	90.4425	100
Daco+Tram	-10.7732	-10.8067	-10.4367	-7.97067	1.1522	10.4331	3.67026	21.1617	18.2387	16.6907	34.4921	33.4812	55.9316	48.2128	53.9921	82.411	84.8368	99.4136	107.761	84.0023	108.714	100
Daco+Sch		-10.5764		-8.68054	-5.00381	-1.29972	6.58335	24.2512	13.9695	26.5457	35.4192	41.9615	55.0751	50.2818	80.4151	67.9615	89.3431	93.1152	81.607	89.6406	100.399	100
Lap+Sel	-10.2892	-10.334	0.671841	8.29689	2.79607	9.19511	17.4405	27.5118	31.95	54.2901	66.1833	51.5234	71.3474	87.5316	60.3521	90.1558	85.3964	105.996	122.866	117.496	84.5443	100
Lap+Tram	-10.8973	-9.10369	-7.20562	5.83466	9.27817	29.5985	32.1347	42.7167	71.7369	61.8135	63.3462	90.2902	74.2894	98.5657	81.8557	96.8466	93.1839	107.799	113.68	113.033	107.862	100
Lap+Sch	-10.3316	-9.64516	0.824757	12.3254	5.99243	0.742396	11.137	16.9571	23.7403	34.688	47.6453	88.7222	77.0756	85.6115	80.6646	75.6565	110.114	118.036	95.1602	102.583	92.1249	100
Tram+Sch		-8.11149	-9.98214	-1.89746	6.25139	0.859871	1.57381	17.6305	24.2707	41.6087	66.513	58.3907	65.7034	105.659	84.3339	80.8101	125.807	116.267	112.877	114.709	124.422	100
Sel+SCH		-9.12476	-9.70934	-10.2744	-5.5978	4.34004	-4.4871	5.93788	5.04153	24.7029	74.6649	72.5214	95.32	132.48	83.57	120.379	88.2661	92.4166	131.486	86.3565	104.478	100
Sel+GDC-0994		-10.0601	-10.9662	-9.10527	-3.98047	7.94494	-5.89009	30.042	45.0462	52.3924	84.6027	106.349	85.9278		116.521	101.965	136.124		110.422	93.7806	87.2236	100
Tram+GDC-0994		-11.0168	-11.0168	-2.40211	2.64476	-10.8688	8.41261	24.7808	53.1524	75.4638		108.629	83.0438	136.572	159.137		126.887	126.205	75.3664	109.369	125.893	100
GDC-0994		93.7806	111.747	93.0401	84.3689	126.985	141.385	74.6844	118.06	74.6259	132.538	85.655	121.86	126.556	91.9294	105.55	152.336	132.168		139.027	96.2748	100
GDC-0973+GDC-0994		4.47644	-5.14963	-6.53313	-6.04598	-7.60485	-11.0149	-7.64383	-9.24168	-10.822	-7.35154	14.4922	108.531	52.1001	82.6931	88.1881	129.674	111.201	130.96	107.284	110.753	100
GDC-0973+SCH		16.129	-7.58537	-10.9214	-11.0149	-4.4871	-8.67658	-5.89009	-9.6314	-7.54639	-7.60485	-1.75907	-9.17348	28.0545	61.3754	137.644	134.37	88.2856		66.4028	120.866	100
GDC-0973		21.6241	-3.24	-7.29308	-8.85196	1.14434	-3.74664	-8.7935	-4.40916	10.0884	64.5906	41.1685		94.0924	83.4725	71.3133	83.531	134.428	116.891	104.284	115.196	100
	%ATP (normalized to DMSO)

## Sheet: P6T
drug concentration (µM)	20	13.5	9.1	6.1	4.1	2.8	1.9	1.3	0.85	0.57	0.385	0.26	0.175	0.12	0.08	0.055	0.035	0.025	0.015	0.01	0.005	0
Afa	10	19.0237	21.239	48.864	58.9072	42.8317	38.5876	47.3301	64.2541	75.1869	66.8557	81.4004	66.9439	83.0141	96.1939	92.6329	92.6348	114.378	105.428	113.176	106.197	100
Daco	1	2.48984	11.6433	16.7471	27.4572	38.5126	31.2641	54.8284	45.7638	61.7648	59.8425	73.1211	68.1817	75.0328	68.1763	92.3653	93.5557	63.5575	84.4333	97.2781	107.124	100
Lap	4	12.6163	12.3668	31.0867	59.8652	70.9947	72.6432	73.4551	82.6207	83.0875	98.7861	90.8579	89.8358	99.7124	90.9764	99.7964	102.153	89.781	103.863	97.3431	110.099	100
Sel	3	21.9237	11.0293	16.5094	12.9427	61.8154	52.6429	58.1628	73.8684	63.1754	82.6396	71.2762	86.0293	108.266	82.6816	101.476	89.3958	91.8917	109.016	75.6306	103.194	100
Tram	39	6.84121	38.8559	16.1703	39.0936	51.5934	54.1725	57.3498	59.1856	79.2577	81.0509	87.3067	88.1698	95.5122	93.9207	93.333	89.3763	105.941	108.94	93.2191	115.145	100
Sch		-2.8278	14.7894	23.402	26.3971	46.3245	38.5124	45.2344	41.8029	72.2886	52.9457	63.4279	90.3297	71.6936	84.2428	84.0292	96.8928	121	104.275	92.1997	107.37	100
Afa+Sel		-6.54606	-6.09541	-2.87275	3.06307	11.2613	-1.4909	15.314	25.514	12.2215	11.9694	36.1258	52.4392	58.2845	50.6165	63.5876	67.4614	92.3671	76.1308	97.8663	98.7008	100
Afa+Tram	1	-5.76487	-9.9791	-0.0560948	4.2647	5.53143	23.7542	33.0544	27.7137	27.8614	33.2303	35.4665	62.1897	66.6697	62.9579	80.5424	110.382	93.3949	91.2198	118.63	94.5302	100
Afa+Sch	1	-15.4247	-15.9788	-11.8095	-3.16996	3.85923	9.12966	17.9941	17.7562	21.6564	32.7511	44.1721	42.0442	93	79.5386	92.945	96.0144	78.5218	108.833	114.578	86.6883	100
Daco+Sel		-9.58646	-11.4136	-2.31101	8.95895	18.4886	9.51061	13.6373	9.08851	14.5147	10.4393	19.9033	44.601	55.9601	64.2578	79.6916	88.0585	75.1399	89.3586	109.097	105.622	100
Daco+Tram		-8.01936	-7.07396	0.424125	2.0296	9.4009	24.2804	26.721	27.106	15.9009	36.9469	44.3947	54.4045	58.1007	59.8073	65.7698	81.8688	82.4374	94.008	102.971	114.859	100
Daco+Sch	1	-17.0697	-16.375	-5.43688	1.49403	1.01902	3.67454	17.8792	20.3492	21.1184	31.657	40.7117	52.7865	64.1633	69.0915	67.8823	65.1048	86.9877	109.103	98.2082	111.944	100
Lap+Sel	1	-8.13748	-0.123629	2.91558	6.66037	24.4707	18.4608	23.9913	21.5187	39.409	59.1603	59.2297	70.9086	86.0679	85.6823	95.4469	88.7767	93.9261	105.624	113.012	99.2451	100
Lap+Tram		0.30273	1	8.9469	6.01639	23.6872	29.7162	34.5237	39.4144	54.1829	52.1125	76.2831	64.7299	80.5817	97.6563	111.904	97.5502	106.459	97.6058	122.594	110.587	100
Lap+Sch		-7.87498	-3.9729	1.59317	8.14721	2.99692	8.27359	9.24895	19.4757	50.3395	50.4442	64.9512	78.9033	81.5255	89.2832	86.8189	102.599	82.369	90.0381	96.5761	88.6228	100
Tram+Sch				0.0209691	4.67366	2.73089	6.5839	4.83936	4.207	20.0225	11.7377	30.8438	34.6667	69.6664	83.4023	90.4618	104.224	105.408	71	100
Sel + SCH				-10.8838	-1.47733	-1.37955	-4.11427	2.94278	8.21422	0.914551	6.34445	13.3076	42.5221	37.7829	38.6117	62.2919	76.9374	93.7458		100
	%ATP (normalized to DMSO)

## Sheet: P8T
drug concentration (µM)	20	13.5	9.1	6.1	4.1	2.8	1.9	1.3	0.85	0.57	0.385	0.26	0.175	0.12	0.08	0.055	0.035	0.025	0.015	0.01	0.005	0
Afa	-76.8598	-57.2879	-30.5317	14.4615	14.1032	27.9691	26.4459	16.4772	31.8783	42.3878	26.8478	35.7029	38.4856	61.4095	58.2772	71.3276	76.3445	64.9863	70.4297	83.0229	90.6832	100
Dab		76.397	87.688	67.9364	80.9621	58.8366	44.1979	67.2668	59.354	66.8712		107.531	79.0447	88.9966	52.3542	84.5228		108.992	105.674	91.4009	73.8558	100
Lap		-80.2463	-69.8988	-28.9956	-73.7608	20.3377	29.1636	10.4467	43.8023			43.7719	39.3589		59.567	52.5368	69.7624	52.1412		78.1926	90.3053	100
Sel	23.4534	37.009	31.8527	59.0585	51.5016	57.7448	66.0653	66.1275	72.024	77.5461	62.1148	82.8418	97.4293	91.9956	89.5936	77.0801	79.9033	74.3163	90.2407	98.3176	68.777	100
Tram		17.0813	16.4422	26.5463	19.1508	16.99	31.9331	78.2839	42.098		82.6968	39.9372	67.2364	70.7363	92.3748	64.4973	73.7492		130.874	99.7398	100.135	100
Sch		42.1589	80.5664	73.7797	7.76856	65.1364	81.936	53.1759	93.1661	47.5761	49.3413	80.4751	47.2109	76.4274	79.9578	106.587	77.5839	68.6972		62.8843	77.8883	100
Afa+Sel	-112.483	-84.1517	-48.8958	-33.0172	-15.6282	-1.45876	14.4778	10.1666	17.187	23.0518	23.4939	20.8873	13.6309	20.8309	45.0254	26.3819	35.7727	53.5966	58.2647	76.1777	82.0367	100
Afa+Tram		-80.2463	-76.2594	-66.8858	-30.1521	-22.4523	22.2551	19.6378	14.3423			17.7509	8.2555	17.7204	31.4461	15.3466		23.1377	4.60343	39.2981	52.4151	100
Afa+Sch		-80.6115	-79.6376	-81.3236	-49.9341	-75.7025	-31.4303	-22.0871	-2.79201	9.83806	-2.94418	2.65567	-0.905096			31.9939	17.5683	26.2115	38.7503	43.8327	76.8079	100
Dab+Sel		19.7291	30.594	16.5944	-4.00937	-74.3725	-73.353	27.9158	21.829	26.6071		92.4357	94.6573	99.6485	81.3273	85.2837	84.3707	27.2767	95.7529	64.3452	91.0814	100
Dab+Tram		31.1418	-70.3735	-81.4347	-81.3735	11.8467	7.79899	23.7768	18.4508	34.8852	72.1058	91.0966	52.902		77.31	85.4054	62.793	98.8876	86.8967	62.1235	89.2857	100
Dab+Sch		35.7677	35.859	24.2637	6.4599	26.6984	26.4245		30.5027		35.1591	14.5249	80.6577	85.0098	66.6277	113.252	91.2792	109.722	92.4052	48.976	61.7431	100
Lap+Sel		-80.9158	-76.2594	-56.2948	-40.5909	-10.7353	-11.1309	3.99476	22.3464	6.24686	-2.03116	31.9331	19.4247	60.8453		56.0976		41.9154			100.668	100
Lap+Tram		-80.7332	-71.7857	-56.0818	-31.9172	13.9162		-16.0003	3.29478	4.17736	25.755	5.36428	27.1854	17.7813	30.594	45.3848	100.866	55.5498	100.105	70.9189	61.3931	100
Lap+Sch		-77.7203	-76.3507	-79.9054	-55.1687	-3.49199	-18.8002	13.7032	13.0945	12.6988	8.62071	11.8163	30.9896	30.2896	24.7811	50.4673	90.5488	56.1889	79.9882	45.5979	96.3464	100
Tram+Sch				-71.7217	-71.0826	11.6945	40.3328	9.68589	44.3501	13.551	2.41219	27.4897	45.9935	43.0414	51.2282	68.6972	46.9065	66.9625	90.7314	100
Sel+Sch				31.9939	-12.8656	27.6419	10.6293	39.0242	16.3813	35.4634	15.4683	8.04246	16.4726	26.7897	42.9197	56.4628	56.6758	97.4877		100
	%ATP (normalized to DMSO)

## Sheet: P9T
drug concentration (µM)	20	13.5	9.1	6.1	4.1	2.8	1.9	1.3	0.85	0.57	0.385	0.26	0.175	0.12	0.08	0.055	0.035	0.025	0.015	0.01	0.005	0
Afa	18.6879	38.084	46.6159	46.1571	57.3523	67.3399	64.1947	72.8742	54.3828	70.1459	68.2482	82.839	86.6433	92.5751	86.6532	89.4966	91.4184	108.455	90.7525	99.9317	112.219	100
Daco	0.689783	3.61319	22.9127	8.18236	54.4422	34.1758	28.9675	61.6513	57.7235			74.5244		61.3321	104.112	76.296	101.652	99.8705	105.954	123.526	111.155	100
Lap	2.90695	6.0383	14.0245	17.0867	37.7204	29.6423	88.1821	74.6755	46.3133	108.842	50.9011	93.6179	104.48	111.045	109.386	114.742	123.166	82.7556	109.442	127.65	125.054	100
Sel	15.8876	24.3442	26.3304	31.5819	30.8812	44.6042	54.2084	58.9165	65.0886	65.9601	67.5162	78.4969	86.7688	88.1305	82.9319	106.655	97.7268	98.3965	98.8245	99.2827	97.6163	100
Tram	1.59127	16.321	4.66294	-11.3582	22.2394	18.3675	13.2455	40.7489	63.8107	46.2914	46.3301	83.5512	90.7315	81.9753	104.248	101.862	102.082	90.5196	66.5557	95.4532	98.0194	100
Sch	0.230489	0.246437	0.817801	0.627305	4.09207	2.67439	25.617	39.861	1.21013	32.6041	79.9432	99.3814	99.2437		99.094	107.241	112.103			94.8029	97.3614	100
A+S	-21.2795	-14.5305	-3.52049	0.905789	-0.232646	2.82553	7.19819	8.26769	4.62689	13.0938	17.4183	21.0818	22.5055	54.72	59.6516	76.0833	82.004	89.2729	91.2766	100.925	92.2881	100
Afa+Tram	-25.3229	-20.0262	-18.0853	-15.3596	-2.79356	-7.4354	-0.665429	0.100194	0.844983	11.0621	16.695	22.8439	53.1911	62.2007		67.6761	58.2793	72.5675	93.5301	104.528	93.0074	100
Afa+Sch	0.954933	0.345889	0.129178	0.704852	0.615563	0.448017	0.876512	2.17397	1.71078	3.8865	13.4023	16.7595	36.5262	63.982	72.921	70.1072	74.3653	64.477	82.4029	91.4345	117.875	100
Daco+Sel	0.813596	0.895787	0.870551	0.895349		0.71414	0.805621	1.43827	2.08424	2.30619	2.15338	5.73223	12.4856	34.9804	68.7488	80.7513	96.8953		110.774	119.069	121.37	100
Daco+Tram	0.330257	0.964923	0.60207	0.958262	0.768204	0.671109	0.679793	0.738061	1.73646	2.27561	0.843685	9.54431	30.269	55.8794	80.058	61.475	88.8587	120.07	92.3567	129.975	68.5187	100
Daco+Sch	0.796772	0.450304	0.629758	0.457839	1.1718	0.431051	0.895787	0.604699	2.28288	4.11091	6.94171	0.719541	23.6799	63.5965	64.5614		113.868	89.1158	91.5888		106.093	100
Lap+Sel	0.971758	0.208916	0.497954	0.433918	0.547567	0.469582	1.26863	0.446765	1.85274	2.3371	14.2473		72.4928	83.8246	102.855	114.522		123.194	102.146	117.966	104.29	100
Lap+Tram	0.39694	0.610481	2.22733	0.462047	0.7024	0.314214	1.40418	1.6689	2.21314	4.58741	29.0541	69.0494		99.3175	98.8198	81.6587		114.6	117.934	110.455	119.472	100
Lap+Sch	1.18153	0.471596	0.97798	0.850836	0.258932	0.49175	0.782138	1.24821	1.30648	0.764877	5.74835	43.4852	75.5773	81.1892	94.8187	105.062	109.11	80.5792	87.9107	110.132	77.8608	100
Tram+Sch				0.00950839	0.832435	0.565706	0.334726	0.358824	0.390718	0.807252	1.08786	7.82584	53.0138	41.2493	90.4116	127.889	108.216	107.111	94.356	100
	%ATP (normalized to DMSO)

## Sheet: P11T
drug concentration (µM)	20	13.5	9.1	6.1	4.1	2.8	1.9	1.3	0.85	0.57	0.385	0.26	0.175	0.12	0.08	0.055	0.035	0.025	0.015	0.01	0.005	0
Afa	3.21921	5.558	28.9472	14.241	21.3055	29.4146	33.102	16.8212	28.9729	39.2788	47.4439	49.5122	61.9722	62.0922	60.4211	84.514	90.6839	85.8965	99.0919	95.5811	92.9947	100
Daco	-8.62745	-7.9598	41.4868				58.0716		43.538		59.9088	70.1825	85.3329		74.9157	105.056		128.809	108.319		101.931	100
Lap	0.611935	-4.06145	2.03977	42.0956	50.1368	42.4877	37.7821	79.3993	97.1613		114.598	115.681	120.755		125.057		95.4541	98.206	111.874	105.14	126.634	100
Sel	1.41926	17.9463	22.4522	26.8678	20.6953	54.3551	35.9705	38.735	70.0562	65.4569	78.3122	79.8417	88.0314	87.1051	81.0844	91.5901	107.444	106.867	115.047	116.175	120.804	100
Tram	3.44105	7.88717	11.3656	30.9824	20.3817	25.1682	31.0015	64.5995	56.7941	53.321	69.2221	84.365	135.929	111.596	117.852	107.577	122.874	116.369	113.956	116.331	89.643	100
Sch	-5.94321	-6.7102	0.601782	0.289097	16.3799	1.40266	4.71502	4.03014	35.7559	-1.72101	5.18525	3.75796	79.2918		119.455	111.278	127.564	138.016	80.4104	131.096	104.11	100
A+S	-5.48908	-5.45827	-4.86032	-2.84171	-3.24784	-3.56203	-1.56851	-0.241031	0.904733	8.44578	7.72296	9.75298	24.7714	43.4089	41.9999	61.9947	74.3607	64.7465	88.5961	84.3172	92.1821	100
Afa+Tram	-6.04952	-6.10704	-5.17126	-3.0878	-5.10055	-1.62209	-6.40183	-2.25959	1.34914	1.12012	9.42901	29.1451	22.2039	51.4658	38.5038	55.2614	83.5473	137.133	136.255	91.7686	114.961	100
Afa+Sch	-8.26643	-8.75244	-8.68094	-8.99551	-8.46847	-4.6306	-7.27355	-4.94546	-0.734252	3.2217	7.35368	12.8546	25.5342	38.2893	74.0854	105.645	145.751	107.909	115.04	131.629	151.791	100
Daco+Sel	-9.67909	-9.67909	-9.67422	-9.76696	-9.57889	-4.52429	-5.96609	1.55105	2.40296	22.9203	19.4099	27.379	54.496	43.0581	72.4983	82.9711	117.205		115.941			100
Daco+Tram	-9.38958	-9.72541	-8.77045	-7.07949	-0.355217	3.06298	6.68296	-7.49631	-7.31972	-9.30532	26.2403	51.2627	27.2746	28.8294	90.4545	111.265	109.678	91.3788		176.737	111.188	100
Daco+Sch	-8.65535	-8.78832	-9.34353	-9.30532	-8.83951	-5.15277	-6.02771	-3.2977	-5.42636	4.78982	16.9837	21.7913		54.5047	90.7384	84.0373	86.6184		52.9751	142.011	143.769	100
Lap+Sel	-8.73971	-9.78147	-9.3006	-9.39472	-9.42289		1.57109	3.19099	-0.977051	60.379	48.3082		76.3872		108.595	55.9655	78.2209	94.4964	86.6138	70.7487	106.542	100
Lap+Tram	-9.3614	-9.48423	-8.31247	-5.29077	-1.70884	-0.585559	13.6829	16.9259	30.9363	58.8595	52.8845	92.0955		79.6318	59.6678	147.791	115.452	105.215	98.9546	135.09	93.1609	100
Lap+Sch	-9.0211	-8.89828	-9.60191	-6.27078	-9.36913	0.91093	1.04649	0.435213	3.20546	16.1137	27.0313	43.1087	81.431	99.6629	64.6496	123.107	107.577		56.4902		82.2562	100
Tram+Sch				2.00605	8.58706	4.84616	5.87993	2.64319	10.1449	13.0588	9.7342	25.0175	63.7503	124.203	86.584	88.9573	107.052	125.844	92.1072	100
	%ATP (normalized to DMSO)

## Sheet: P14T
drug concentration (µM)	20	13.5	9.1	6.1	4.1	2.8	1.9	1.3	0.85	0.57	0.385	0.26	0.175	0.12	0.08	0.055	0.035	0.025	0.015	0.01	0.005	0
Afatininb	-11.1028	5.31065	-18.5055	32.8617	51.0558	41.8632	19.0944	20.9579	46.4504	28.8983	14.0001	34.4995	30.8519	46.6334	35.9879	34.2905	61.3233	75.9477	105.028	63.0652	102.923	100
Dacomitinib	-10.6991	-10.5048	6.98363	-19.5899	10.822	34.5384	15.2905	-3.10546	19.0004	24.7068	28.7212	22.5083	34.8649	42.7349	42.3827	45.5403	68.5828	90.2007	80.2662	91.0248	72.494	100
Lapatinib	-10.8838	-1.85711	0.637929	12.543	11.6244	23.7655	32.6031	36.7528	54.2244	8.2485	30.771	29.952	37.7651	63.5151	63.7004	105.383	110.163	86.7597	71.4688	74.4247	96.0333	100
Selumetinib	53.6761	1.81185	40.8519	44.4364	42.1151	40.8531		53.8268	75.0136	90.8757	82.4787		105.72	89.3916	114.546	81.9218	89.2431	71.8363	119.478		103.609	100
Trametinib	-8.76533	36.6244	63.1123	26.1501	57.8589	43.6209	38.3362	58.8799	82.73	67.6254	75.0712	85.1052	51.9461	84.9979	73.6028	79.3156	61.7289	67.6871	111.47	76.5872	92.7371	100
SCH772984	24.214	36.7881	63.0172	56.2413	36.1362	36.4167	86.7733		38.3534	58.9093	48.7006	29.598	76.4633	81.583	88.9732	95.9026	95.231	108.243	90.4356	70.7837	82.7334	100
Afa + Sel	5.90625	-0.918376	-11.2784	0.692943	21.0749	-3.52257	22.4824	30.632	19.0298	11.6409	17.7415	31.8803	23.285	25.9965	41.0817	63.2934	48.7857	84.1443	87.6282	67.3283	98.5089	100
Afa + Tram	-11.0815	0.992392	18.9448	12.1942	-1.62251	12.1327	10.9804	10.7999	31.1533	15.5673	28.0621	23.8098	8.26369	50.5493	42.0385	59.2337	66.9834	62.2045	78.7075	90.4032	86.7796	100
Afa + SCH	-10.8597	-3.28823	14.8224	35.5305	37.1071	14.665	8.30214	17.8485	22.8427	18.8641	20.2182	20.8476	23.3168	25.7726	28.1617	52.36	67.8132	68.3893	88.5398	91.2217	67.9768	100
Daco + Sel	-11.0684	-11.0211	-11.7721	1.67515	-5.05398	-0.40676	3.32862	17.4084	14.1958	41.188	24.5628	37.0423	32.5983	50.1833	18.2418	64.5532	66.2984	69.4695	82.9857	70.8211	72.6886	100
Daco + Tram	-10.9181	-5.81095	12.3264	16.2418	16.1902	18.3743	30.1456	18.8959	58.8035	18.095	26.7261	27.9399	26.3367	17.8011	35.6313	55.9127	81.1009	71.9183	89.0595	55.7429	79.2428	100
Daco + SCH	-10.6919	-10.744	-3.02514	-0.322311	5.54245	-3.0307	6.98895	31.6858	13.4011	7.44328		30.6818	17.8109	37.7457	10.3631	64.3315	70.8281	73.2524	63.4432	98.6808	84.6245	100
Lap + Sel	-11.0921	-13.1403	-14.476	-8.3919	5.86506	21.1111	23.1841	9.01117	12.9964	42.0928	51.7168	56.5339	55.8439	69.6951	68.2881	61.1685	110.37	93.224	81.3226	75.3376	94.7673	100
Lap + Tram	-11.1038	-6.30674	-12.5018	1.08069	28.0831	5.18405	9.19595	33.5298	3.96876	51.6433	42.4515	74.3263	48.5268	42.1824	108.705	72.781	115.683	84.7168	120.475	97.2372	98.468	100
Lap + SCH	-10.8233	-5.05727	-9.73992	11.2343	10.3706	18.9134	-13.4699	32.1623	25.0181	30.9341	61.1876	52.2813	55.9887	49.0016	75.3093	41.1079	62.1253	80.9095	82.796	70.0248	69.3166	100
Tram + SCH				31.1138	36.8287	37.8506	54.784	50.9265	25.0144	36.851	55.6476	55.8691	68.45	73.2403	66.1226	102.745	93.7861	102.691	89.172	100
Sel + SCH				23.3776	6.89764	45.7124	36.1044	40.5006	83.1647	45.5003	73.8337	36.0454	60.9424	75.3941	80.2912	50.0164	113.552			100
	%ATP (normalized to DMSO)

## Sheet: P17T
drug concentration (µM)	20	13.5	9.1	6.1	4.1	2.8	1.9	1.3	0.85	0.57	0.385	0.26	0.175	0.12	0.08	0.055	0.035	0.025	0.015	0.01	0.005	0
Afatininb		-32.5916	-24.1885	-17.3839	-6.01232	-4.45957	14.1276	-1.94779	8.4647	5.17654	14.1276	4.85687			26.3212	38.5148	33.3085				52.0556	100
Dacomitinib		-32.5459	-32.4089	-14.2327	-12.68	8.09934	4.53718	12.8946	8.96705	5.90725	19.6992	11.7072	10.2458	26.7779	28.3763	36.1857		48.8359	50.617	58.1067	78.7946	100
Lapatinib		-31.4955	-24.8735	-7.29104	-5.50997	6.77494	15.6347		6.95763	20.2472	23.9464	15.2694	27.5999	83.2702	38.4234	61.8059	58.3807	80.0277	88.7504	78.7033	71.4648	100
Selumetinib		7.36865	28.4676	36.551	27.8283	41.8486	43.173	23.2157	48.8359	127.067	53.6311	37.099	92.0386	110.626	70.6656	78.1096	71.4876		86.6497	75.4608	101.949	100
Trametinib		10.7025	18.9685		12.5749	39.3825	33.6739	36.0487	23.0787	61.1208	55.9603	55.7776	52.5351	86.9237	40.1588	62.9933	87.9284	72.401		107.84	75.0041	100
SCH772984		-10.4422	-5.82964	-30.098	12.6662	6.18126	10.1544	11.2962	15.5434	10.8395	25.8645		37.4187	57.0563		60.8011	96.6055	63.9523	97.2449	108.753	93.8197	100
Afa + Sel		-31.9979	-30.2625	-25.0562	-5.19028	-10.6705	0.381313	-7.38239	-6.78869	-1.44543	11.6158		9.3324	5.45055	19.7906	28.0566	35.2266			62.7192	63.6098	100
Afa + Tram			-25.5586	-27.3853	-31.7787	5.54188	-3.54619	-5.55562	1.15768	-3.50054	2.66476	2.20806	24.9968	3.94347	13.1229	25.8188	42.9446	46.2785	36.7793	38.6518	74.0223	100
Afa + SCH		-33.0026	-32.2719	-28.2987	-31.9568	-31.9979	-30.3173	-5.96664	-9.66581	-6.19498	13.9906	-4.64225	42.2139	6.18126	13.4883	19.7906	41.1636	44.4517	60.6185		68.9759	100
Daco + Sel		-32.5916	-31.2215	-31.9705	-31.6553	-2.49581	-7.33671	2.1624	9.10406	6.54661	38.2864	12.4379	5.77024		11.0222	37.4644		17.7355	30.9337	59.0201	97.9756	100
Daco + Tram		-32.4089	-32.4089	-25.2845	-13.2736	-3.86588	-3.22652	4.17183	-0.303721	11.5245		9.19539		4.0805	13.3056	7.82532		27.8283	56.4169	63.7239	70.5971	100
Daco + SCH		-32.1805	-32.5916		-24.3712	-31.8335	2.20806		-9.16346	0.609652	8.23635	0.929341	6.95763	36.3227	24.2661	15.6347	28.7416	41.0722	36.5967		48.5847	100
Lap + Sel		-30.3995	-25.9696	-20.9917	-8.47843	12.7119	2.43642	20.2929	-0.0297077	11.9812	6.86629	21.2976	22.1197	29.4723		43.1273	37.9211	40.3415	86.193	104.415	81.9001	100
Lap + Tram		-32.8199	-23.6405	-1.71945	-3.08952	-7.6564	-5.28161	5.31354	19.6992	14.1733	21.115	20.7496	19.1512	24.5401	43.8123	86.1017	65.1397			106.561	74.0223	100
Lap + SCH		-32.6829	-30.5365	-20.7177	-9.62015	-1.71945	6.54661	1.97972	3.85214	3.0301	13.5339	14.8127	14.5843	30.5227	32.5778	34.4046	40.5699	64.1806	98.0212	79.3427	66.2129	100
Tram + SCH				3.12145	3.07578	2.25373		-7.33671	20.978	23.033	11.7528	0.381313	16.5937	18.1465	31.7558	49.4296	39.4738	61.9885		100
Sel + SCH				-6.56035	-2.35881		1.43169	5.22221	14.0363	15.6347	7.14029	14.4016	12.8032			33.1715	35.729			100
	%ATP (normalized to DMSO)

## Sheet: P18T
drug concentration (µM)	20	13.5	9.1	6.1	4.1	2.8	1.9	1.3	0.85	0.57	0.385	0.26	0.175	0.12	0.08	0.055	0.035	0.025	0.015	0.01	0.005	0
Afatinib	-35.0477	-19.7895	-3.24079	5.22993	7.93127	9.67841	10.2198	1.47435	7.61873	2.71221	5.64123	5.27081	4.90792	8.72436	19.9754	40.6306	55.0285	62.3252	68.2765	79.3314	83.9001	100
Dacomitinib	-38.6451	-36.7305	-16.167	-0.0434555	3.78075	5.85445	8.17961	4.37034	8.89712	2.90226	7.97685	3.28302	3.90295	14.4977	17.6997	28.7178	60.1472	60.3181	79.4611	83.4556	92.5361	100
Lap		-27.1658	-6.76385	5.32009	1.27553	-3.45456	11.7711	5.49647	7.66178	10.5184	27.9749	33.0193	49.2439	72.6244	78.6812	88.6591	80.8659	79.4175	99.0825	74.9116	82.064	100
Selumetinib	2.90991	17.4534	23.7029	20.9537	45.1803	38.4246	51.3604	55.9711	65.797	64.8623	72.0051	85.6862	78.8568	78.0496	92.6027	95.2446	86.5053	90.241	90.1514	92.6582	94.8644	100
Tram		-7.77277	12.8973	5.17228	6.92138	16.0806	30.7809	60.9693	60.803	62.169	72.8482	77.3058	72.8975	71.4956	102.651	102.143	79.0209	80.5176	72.642	81.1809	76.26	100
SCH772984	-10.1627	8.84214	31.7327	30.2824	43.6495	46.9587	39.0437	31.8804	41.803	51.5109	60.3568	77.8685	82.3554	75.3556	72.4798	96.6514	72.8689	95.8441	89.6464	86.2003	95.9656	100
Afa + Sel	-39.0708	-18.0966	-2.0172	4.50996	4.46183	0.975822	-1.2335	4.90764	5.88851	3.26166	10.8125	7.64265	9.15718	13.3064	13.8784	21.0312	34.5658	50.2265	74.0923	87.8292	85.8051	100
Afa/Tram	-26.4758	-16.7241	-13.2189	6.51348	3.3167	11.3551	17.2613	14.2887	9.50185	13.6813	13.7926	16.8242	14.7871	14.678	33.8472	38.8613	61.7411	43.9437	82.5476	77.4079	69.1441	100
Afa/SCH	-32.8466	-25.9925	-19.6639	-15.2389	4.47426	10.9355	12.9006	9.12708	12.0031	14.1253	21.665	18.6676	11.2875	21.3221	31.744	31.8138	37.6371	72.1747	68.993	52.8636	93.3755	100
Sel + Daco	-43.009	-33.4339	-13.127	-11.9155	-6.99546	4.61824	8.53869	7.32997	3.2683	5.8639	2.59057	8.42043	4.40476	4.23363	7.77027	8.24463	24.0565	41.9889	42.2132	68.8398	92.3456	100
Daco + Tram		-24.4443	-5.94855	5.85307	-11.8736	20.1135		24.2284	8.03154	7.46245	26.3151		13.2144	15.4988	24.298	1.10511	60.1238	13.9553	74.6764	51.4132		100
Daco + SCH		-48.8604	-28.5862	-12.2055	11.0972	5.55946	0.900072	5.68349	6.45922	13.5201	-2.63156	13.5934	9.50308	3.04441	11.1266		71.509	86.351	111.84	99.3361	81.6991	100
Sel+Lap	-39.821	-25.0344	-18.9009	-18.4004	-20.6875	-9.7175	3.76438	-0.00800356	-4.0287	-2.99893	16.3282	2.39483	14.1968	24.7406	60.3865	36.6028	70.1089	70.9296	92.0696	81.3877	66.1646	100
Lap + Tram		-14.7003	-12.3906	-1.07008	3.55854	-13.0673	1.86348	8.14271	9.87243	16.5896	16.4763	24.8797	33.6367	53.6018	31.1172	94.6002	110.536	102.163	104.204	96.4496	94.2137	100
Lap + SCH		-38.2759	-13.1089	-2.80237	-0.815591	3.36641	4.25022	13.5001	10.5214	1.82846	28.6592	20.4093	39.5022	48.586	70.9261	48.9169	76.0783	91.0816	98.1154	76.3111	69.3001	100
Tram + SCH		-4.1652		-10.2632	20.352	8.91013	22.1068	24.1096	8.87472	23.1386	17.93	19.501	50.3812	79.2501	75.1308	95.2711	70.465	101.193	100	87.1187	94.2751	100
Sel + SCH		-13.7709	6.02431	12.2157	14.9573	16.7479	11.9029	9.18812	15.7018	15.2929	28.7666	27.1446	52.3383	62.6715	75.9924	79.9244	79.6648	98.7509	100	52.6102	103.501	100
Sel + GDC-0994		29.8544	32.3214	28.3515	6.03902	21.8947	23.0645	21.9909	33.1449	23.3347	97.9157	58.1635	88.5134	95.5788	123.344	90.0207	78.8031	90.4352	86.9378	103.988	99.544	100
Tram + GDC-0994		14.3235	22.0252	2.92126	26.8184	12.6203	5.05823	22.0589	-1.92659	32.2288	36.0411	78.8061	65.2497	84.9896	115.479	97.9726	106.549	52.2518	73.9439	119.562	95.5492	100
GDC-0973		-3.50588	12.6182	19.4984	22.2731	12.6796	-8.96729	21.1513	11.2455	12.5757	17.0797	30.7512	31.6891	50.7729	69.0807	98.1204	96.5341	99.5827	81.0539	77.176	106.311	100
GDC-0994		95.7267	105.858	108.573	118.453	92.425	103.9	99.2513	100.777	70.6559	105.821	93.4669	81.6649		94.1199	95.8325	106.631	81.8788	111.147	97.9177	88.9566	100
GDC-0973 + GDC-0994		15.71	23.9226	25.716	22.1471	17.9141	16.1848	13.7991	1.97951	0.251606	8.96328	18.0795	19.4954	23.5789	40.276	39.0574	105.835	108.72	80.19	113.011	72.5719	100
GDC-0973 + SCH		-54.3841	12.5715	13.7168	6.93021	15.1923	14.4681	19.5638	20.768	19.5583	21.0471	5.13264	22.2165	11.2583	21.8822	38.1785	44.6413	77.3214	104.338	113.491	95.0511	100
MK2206	-6.48297	11.927	45.4619	56.8892	74.9249	71.1933	91.1863	91.7461	85.2092	117.631	126.405	104.188	79.2508	111.364	100.094	113.074	85.2463	106.072	69.8766	95.3217	84.077	100
BYL719	29.1101	15.5228	41.3436	37.4535	70.9157	51.5919	53.805	93.4055	80.0465	67.8396	71.711	81.5999	94.4949	81.9182	103.902	93.5446	92.7047	101.885	106.172	87.9288	100.024	100
Afa+MK	-40.2459	-40.4584	-40.2034	-32.0022	-24.2684	-19.8491	-9.18331	-6.25127	-4.67902	0.505166	2.88479		11.8509	8.91884	19.4997	22.6867	34.2873	46.058	35.6471	69.5143	80.2863	100
Daco + MK	-49.7849	-49.064	-49.1117	-47.7058	-34.4968	-24.5122	-8.66509	-6.91419	-1.56732	-2.49718	7.63988	1.87717	8.83238	1.82032	-2.05231	9.69724	54.3805	64.035	75.9804	77.1382	90.1669	100
Daco + BYL	-49.3024	-49.3999	-44.3827	-41.595	-20.2533	-7.48632	-13.9063	-2.8168	-8.31818	-8.91976	-0.0253563	-3.76177	-2.22701	3.35669	3.21885	15.4265	35.7146	53.4076	87.2616	84.6685	92.7647	100
Sel + MK	-36.3503	-22.0147	-0.45994	10.5167	36.8113	46.5752	58.1427	54.0398	68.2144	61.8978	85.1448	85.5469	74.995	76.7551	80.3334	80.2342	76.0505	86.2957	100.868	95.9836	90.5954	100
Tram + MK	-46.2209	-35.9126	-20.1094	-10.87	-8.36907	-7.77553	-3.9286	-1.84608	10.123	-5.18134	0.0334771	-2.37851	1.84103	3.42182	6.9421	8.92163	25.0893	22.6727	34.5801	54.04	72.1065	100
Sel + BYL	-26.2646	-16.07	-15.6507	-15.1793	1.97547	35.4556	20.1141	18.4443	62.5907	50.5593	44.9033	49.4066	63.6335	68.3682	90.5271	61.4292	77.0654	87.9645	81.0407	93.6666	103.211	100
Tram + BYL	-42.4631	-26.54	-17.0696	-17.1829	-11.7932	-14.8157	-8.62407	-8.15073	-5.80664	-3.27431	-2.16249	-4.41225	-4.96363	2.31978	10.4708	-3.15621	4.19077	13.4594	37.0858	53.7697	55.7556	100
Sel+Afa+MK	-40.5009	-40.2459	-40.5434	-39.566	-28.4753	-13.3052	-12.7952	-16.4922	-3.74416	-5.18894	-0.557172	0.972596	8.79136	1.35503	14.103	14.9529	22.0918	53.1119	60.0808	66.7947	81.9223	100
	%ATP (normalized to DMSO)

## Sheet: P18T-KRAS
drug concentration (µM)	20	13.5	9.1	6.1	4.1	2.8	1.9	1.3	0.85	0.57	0.385	0.26	0.175	0.12	0.08	0.055	0.035	0.025	0.015	0.01	0.005	0
Afatinib	-10.8992	9.58923	41.0414	42.7081	45.0716	50.6232	58.9733	61.385	56.3729	65.3628	60.3085	67.8193	63.4621	80.7756	65.9038	85.2772	83.0997	95.9263	90.8069	87.1569	91.1385	100
Dacomitinib	-45.1931	-24.0438	-6.39098	32.8344	61.6136	55.096	52.5842	58.0261	68.9699	64.8599	63.1029	74.1848	87.7401	90.7876	88.4802	82.6946	95.883	80.6394	88.3262	98.2396	90.1262	100
Lap		3.77946	27.5443	48.9547	36.2063	61.3921	50.4779	59.1856	42.3509	77.3315	73.5705	79.7741	92.668	91.7962	107.477	107.828	111.856	116.091	84.6381	86.4096	99.8749	100
Selumetinib	14.6004	33.1554	38.1874	40.7939	42.2562	52.984	60.9109	62.5785	80.1343	74.538	88.9024	95.3781	90.1228	107.038	86.5683	98.9731	92.4379	95.6821	104.98	104.201	95.6598	100
Tram		7.45712	15.9522	19.5957	26.3058	32.406	36.4992	50.3263	55.0184	68.2407	60.3596	64.993	75.8669	80.9521	81.8407	84.7864	99.1093	91.9391	89.2899	80.7509	100.036	100
SCH772984	-0.151319	9.35612	14.2446	7.32036	28.6572	27.1891	26.213	27.9302	40.8944	44.678	36.9987	56.1903	56.2619	68.882	68.4606	89.7117	74.7383	61.1281	93.8234	87.3122	80.2376	100
Afa + Sel	-43.0301	-24.8563	-6.86399	4.97302	1.88787	5.23331	13.8445	17.4544	19.234	23.5369	35.9613	30.4141	47.7913	68.7281	73.4112	76.9859	73.3167	90.7683	107.153	84.5129	98.7717	100
Afa + Tram	-17.5171	-10.764	-3.01102	5.53273	4.84344	12.1661	4.42732	21.8024	13.9155	30.0153	27.4469	43.6619	43.382	49.6796	55.5999	57.4303	79.8522	67.9128	77.9232	106.072	75.0295	100
Afa/SCH	-24.3997	-7.42514	-9.94856	0.775239	4.02492	6.02459	11.7293	8.93767	12.346	13.9665	20.6718	30.0769	37.964	60.1355	61.041	74.7609	64.9864	60.1492	55.4383	85.1543	99.5972	100
Sel + Daco	-65.8235	-41.5977	-36.7128	-5.02099	9.983	23.9563	20.0218	18.1318	19.7528	30.7985	34.4472	51.0054	46.919	53.567	77.7836	82.4423	104.383	104.864	96.7836	88.072	111.305	100
Tram + Daco	-66.3456	-35.2182	-37.7449	-26.8667	-0.0360924	18.0483	6.61963	23.2281	18.5615	24.4682	24.511	30.8702	40.518	34.9914	63.422	60.6009	64.5464	69.5275	66.4096	94.2439	91.2042	100
Daco + SCH		-23.4232	-2.22679	8.04661	8.0663	23.1001	1.24168	10.4267	21.6492	18.1696	37.4559	38.305	58.6812	61.9939	83.7365	84.3335	83.6577	104.261	98.1669	85.2347	101.134	100
Sel+Lap	-36.8495	-16.4454	-4.77018	4.5538	23.1599	24.8755	12.217	24.726	27.739	32.5547	33.9159	61.7449	36.9115	63.2632	93.6314	85.3965	85.7976	86.2902	65.8558	121.804	102.775	100
Lap + Tram		3.64952	10.6767	2.35718	24.2356	17.1705	32.971	37.5381	32.1759	43.2081	38.5458	59.3003	77.2912	58.1604	87.6296	109.452	98.6282	88.7335	86.4056	94.6167	104.771	100
Lap + SCH		2.06378	-0.879679	5.00048	15.6402	14.1061	24.5592	16.9688	20.0941	37.198	34.5621	65.2672	63.2207	53.7879	57.6061	76.4568	99.1653	68.6311	97.5119	82.375	115.927	100
Tram + SCH		2.67724	-7.90403	3.29602	12.0193	12.8992	12.1914	12.1231	16.049	16.2889	20.0324	54.114	53.1675	60.6013	67.3965	60.4148	116.198	90.9941	108.141	68.189	126.735	100
Sel + SCH		3.54273	-2.25045	12.7842	15.897	17.0565	17.9243	9.67201	24.0505	21.5698	25.8307	40.9413	48.1231	64.2314	60.4679	74.7729	105.703	104.012	86.3921		111.254	100
Sel + GDC-0994		15.5618			27.8741	4.47801	19.1494		35.482	41.5962	53.6153	47.529	50.0557	76.0761	84.8426	108.727	80.5292	98.3275	51.5074		86.9226	100
Tram + GDC-0994		7.70265	16.8182	20.7687	30.3728		24.0492	13.1887	35.4261	43.1178			59.7994	63.4009			123.762	121.793	80.8921	91.1802	85.1707	100
GDC-0973		6.46025		12.1976	2.83079	18.3956	9.48946	15.7712	19.6938	30.8335			40.633	31.2523	48.0455		51.0049	53.8107	80.9759	91.599	94.9842	100
GDC-0994		55.6534	45.2536	54.3831	78.7284	74.736	75.5596	70.3667	72.5862	82.2741	59.2549	87.0343		110.026	117.033		118.052	80.4733		78.5469	97.0572	100
GDC-0973 + GDC-0994		17.4045	31.336	33.3741	26.9109	24.7332		8.59605	8.12143	14.124	11.1925	-0.896383	19.9172	38.6787	42.1267	65.4111	56.1001	42.6711	87.6206	98.4671	103.353	100
GDC-0973 + SCH		16.7623		8.00976	17.4882	4.85492	19.4984	7.93996	1.19754	2.45389	6.92092	17.5161	6.69756		12.0999	38.93	32.9274	50.7117		113.069	82.986	100
MK2206	-3.15679	40.7544	74.5886	75.2281	76.6121	75.498	71.9514	74.8283	62.7413	79.7035	89.064	74.222	90.7534	90.2278	95.2284	89.0808	90.5967	82.2978	79.7489	103.03	93.4663	100
BYL719	34.0609	45.601	58.9862	59.96	94.9429	71.0755	74.6478	86.1735	89.666	84.4763	107.004	84.1922	95.0838	92.5348	109.845	105.341	105.992	98.0066	90.4487	96.1792	99.0435	100
Afa+MK	-45.9598	-46.8229	-45.3365	-45.0536	7.50305	2.22869	23.3261	32.6282	29.4636	30.9979	34.0187		80.0016	74.8231	60.87	76.5972	63.2675	98.6057	92.66	107.716	72.9052	100
Daco + MK	-66.0018	-65.8714	-65.5773	-64.5266	-27.2708	14.1322	34.7587	47.5109	53.6136	41.3295	61.3655	47.7377	76.7281	74.5811	95.9614	80.9695	121.174	102.887	98.6305	117.06	99.6845	100
Daco + BYL	-65.6919	-65.6569	-63.1644	-42.8653	17.3789	32.1084	29.5901	53.7606	47.8101	60.9443	65.6795	66.0478	73.0393	100.625	85.4497	107.347	92.9701	99.9613	106.001	115.528	93.6429	100
Sel + MK	-48.0047	-19.6415	2.03449	17.0172	35.0735	44.8969	58.0439	68.9474	73.625	58.1596	66.9807	83.2732	77.3635	77.5934	88.1044	94.7853	70.4138	90.6764	106.889	84.1488	88.8465	100
Tram + MK	-47.0539	-33.7784	-22.1381	-6.807	2.37321	-2.89467	16.6021	8.90557	15.9649	4.22584	15.6748	15.9831	10.1807	19.9728	32.1753	37.8165	48.3826	46.8507	75.41	96.0091	106.019	100
Sel + BYL	-33.2778	-15.4459	-8.06397	5.94879	28.7204	45.7191	47.4247	69.1827	83.607	78.4017	69.0043	75.9661	79.6066	97.3181	94.3892	92.7459	116.986	91.1058	109.892	90.2774	103.069	100
Tram + BYL	-53.0466	-43.205	-30.6544	-17.7842	-17.1016	-0.212908	-5.93467	-7.9427	7.40067	1.39125	6.23867	5.55717	9.04652	24.1053	21.1868	38.161	40.716	46.4246	61.4044	96.3614	88.7932	100
Sel+Afa+MK	-46.8229	-47.3024	-45.9119	-38.7675	-17.67	-7.8885	-6.83363	-3.09362	-0.216697	4.05074	12.3459		43.8003	63.4592	49.3144	47.0128	71.9941	54.1572	95.1054	89.4954	63.2675	100
	%ATP (normalized to DMSO)

[truncated: 5 more sheets: P20T, P23T, P25T, P26T, P31T]
